# Supplementary material for: Influence of receptor selectivity on benefits from SGLT2 inhibitors in patients with heart failure: a systematic review and head-to-head comparative efficacy network meta-analysis
Source: PubMed Central journal article supplement (PMC8971161; doi:10.1007/s00392-021-01913-z), 2021-09-08
Supplement: 392_2021_1913_MOESM1_ESM.pdf [file 392_2021_1913_MOESM1_ESM.pdf]

## **SUPPLEMENTARY MATERIAL**

**Supplementary material to** Tobias Träger<sup>\*1</sup>, MD; Lutz Frankenstein<sup>\*1</sup>, Prof.; Dan Atar<sup>2</sup>, Prof.; Stefan Agewall<sup>2</sup>, Prof.; Norbert Frey<sup>1</sup>, Prof.; Morten Grundtvig<sup>3</sup>, Prof.; Andrew L. Clark<sup>4</sup>, Prof.; John G. F. Cleland<sup>5</sup>, Prof.; Hanna Fröhlich<sup>1</sup>, MD: Influence of receptor selectivity on benefits from SGLT2 inhibitors in patients with heart failure: a systematic review and head-to-head comparative efficacy network meta-analysis. *Clinical Research in Cardiology* 2021.

**Corresponding author:** Lutz Frankenstein, [lutz.frankenstein@med.uni-heidelberg.de](mailto:lutz.frankenstein@med.uni-heidelberg.de)

## CONTENT

|                                                                                                                                                                                                                               |    |
|-------------------------------------------------------------------------------------------------------------------------------------------------------------------------------------------------------------------------------|----|
| SEARCH ALGORITHMS.....                                                                                                                                                                                                        | 4  |
| Pubmed:.....                                                                                                                                                                                                                  | 4  |
| www.clinicaltrials.gov: .....                                                                                                                                                                                                 | 4  |
| SUPPLEMENTARY RESULTS .....                                                                                                                                                                                                   | 4  |
| Sensitivity analyses .....                                                                                                                                                                                                    | 4  |
| <i>Hospitalization for HF or CV death</i> .....                                                                                                                                                                               | 4  |
| <i>All-cause mortality</i> .....                                                                                                                                                                                              | 5  |
| <i>CV mortality</i> .....                                                                                                                                                                                                     | 5  |
| <i>Hospitalization for HF</i> .....                                                                                                                                                                                           | 5  |
| <i>Worsening RF</i> .....                                                                                                                                                                                                     | 5  |
| <i>Worsening RF or CV death</i> .....                                                                                                                                                                                         | 5  |
| SUPPLEMENTARY FIGURES .....                                                                                                                                                                                                   | 6  |
| Online Figure 1: Flow chart of trial identification and selection .....                                                                                                                                                       | 6  |
| Online Figure 2: Network plots with respect to a) hospitalisation for HF or CV death, b) all-cause mortality, c) cardiovascular mortality, d) hospitalisation for HF, e) worsening RF, , and f) worsening RF or CV death..... | 7  |
| Online Figure 3: Individual risk of bias assessment .....                                                                                                                                                                     | 11 |
| Online Figure 4: Comparison funnel plot for the combined endpoint of hospitalisation for HF or CV death .....                                                                                                                 | 12 |
| Online Figure 5: Predictive interval plot of individual SGLT2i for hospitalisation all-cause mortality .....                                                                                                                  | 13 |
| Online Figure 6: Graphical ranking of SGLT2i based on SUCRA values (all-cause mortality).....                                                                                                                                 | 14 |
| Online Figure 7: Predictive interval plot of SGLT2i classes for all-cause mortality.....                                                                                                                                      | 15 |
| Online Figure 8: Relationship between effect size and receptor selectivity of SGLT2i for all-cause mortality .....                                                                                                            | 16 |
| Online Figure 9: Predictive interval plot of individual SGLT2i classes for CV mortality .....                                                                                                                                 | 17 |
| Online Figure 10: Graphical ranking of SGLT2i based on SUCRA values (CV mortality) .....                                                                                                                                      | 18 |
| Online Figure 11: Predictive interval plot of SGLT2i classes for CV mortality .....                                                                                                                                           | 19 |
| Online Figure 12: Relationship between effect size and receptor selectivity of SGLT2i for CV mortality .                                                                                                                      | 20 |
| Online Figure 13: Predictive interval plot of individual SGLT2i for hospitalisation for HF .....                                                                                                                              | 21 |
| Online Figure 14: Graphical ranking of SGLT2i based on SUCRA values (hospitalisation for HF).....                                                                                                                             | 22 |
| Online Figure 15: Predictive interval plot of SGLT2i classes for hospitalisations for HF .....                                                                                                                                | 23 |
| Online Figure 16: Relationship between effect size and receptor selectivity of SGLT2i for hospitalisations for HF .....                                                                                                       | 24 |
| Online Figure 17: Predictive interval plot for worsening RF .....                                                                                                                                                             | 25 |
| Online Figure 18: Graphical ranking of SGLT2i based on SUCRA values (worsening RF) .....                                                                                                                                      | 26 |
| Online Figure 19: Relationship between effect size and receptor selectivity of SGLT2i for worsening RF                                                                                                                        | 27 |
| Online Figure 20: Predictive interval plot for worsening RF or CV death.....                                                                                                                                                  | 28 |

|                                                                                                                                                                                             |           |
|---------------------------------------------------------------------------------------------------------------------------------------------------------------------------------------------|-----------|
| Online Figure 21: Predictive interval plot for hospitalisation for HF or CV death in subgroups of patients with both HF and T2D (sensitivity analysis) .....                                | 29        |
| Online Figure 22: Predictive interval plot for SGLT2i classes with respect to hospitalisation for HF or CV death in subgroups of patients with both HF and T2D (sensitivity analysis) ..... | 30        |
| Online Figure 23: Predictive interval plot for all-cause mortality in subgroups of patients with both HF and T2D (sensitivity analysis).....                                                | 31        |
| Online Figure 24: Predictive interval plot for SGLT2i classes with respect to all-cause mortality in subgroups of patients with both HF and T2D (sensitivity analysis).....                 | 32        |
| Online Figure 25: Predictive interval plot for CV mortality in subgroups of patients with both HF and T2D (sensitivity analysis).....                                                       | 33        |
| Online Figure 26: Predictive interval plot for SGLT2i classes with respect to CV mortality in subgroups of patients with both HF and T2D (sensitivity analysis).....                        | 34        |
| Online Figure 27: Predictive interval plot for hospitalisation for HF in subgroups of patients with both HF and T2D (sensitivity analysis).....                                             | 35        |
| Online Figure 28: Predictive interval plot for SGLT2i classes with respect to hospitalisations for HF in subgroups of patients with both HF and T2D (sensitivity analysis).....             | 36        |
| Online Figure 29: Predictive interval plot for worsening HF in subgroups of patients with both HF and T2D (sensitivity analysis) .....                                                      | 37        |
| Online Figure 30: Predictive interval plot for worsening HF or CV death in subgroups of patients with both HF and T2D (sensitivity analysis).....                                           | 38        |
| <b>SUPPLEMENTARY TABLES.....</b>                                                                                                                                                            | <b>39</b> |
| Online Table 1: Characteristics of SGLT2i included in analyses .....                                                                                                                        | 39        |
| Online Table 2: Characteristics of HF patients included in SGLT2i trials .....                                                                                                              | 41        |
| Online Table 3: Endpoint characteristics of trials analysing the effects of SGLT2i in patients with HF .....                                                                                | 48        |

## SEARCH ALGORITHMS

### Pubmed:

heart failure AND ("SGLT2 inhibitor\*" OR "SGLT2i" OR "Empagliflozin" OR "Dapagliflozin" OR "Canagliflozin" OR "Ertugliflozin" OR "Ipragliflozin" OR "Luseogliflozin" OR "Licogliflozin" OR "Remogliflozin" OR "Sergliflozin" OR "Sotagliflozin" OR "Tofogliflozin") AND ("cardiovascular outcome" OR "cardiovascular death" OR "cardiovascular mortality" OR "all-cause mortality" OR "all-cause death" OR "death" OR "heart failure" OR "worsening renal function" OR "renal outcome" OR "renal composite") AND (trial OR random\* OR controlled) NOT review

### www.clinicaltrials.gov:

Condition or disease: heart failure

Other terms: Empagliflozin OR Canagliflozin OR Dapagliflozin OR Ertugliflozin OR Ipragliflozin OR Luseogliflozin OR Licogliflozin OR Remogliflozin OR Sergliflozin OR Sotagliflozin OR Tofogliflozin

Recruitment: terminated, completed

Age: adult (18–64), older adult (65+)

Sex: all

Study type: interventional

## SUPPLEMENTARY RESULTS

### Sensitivity analyses

To test the stability of the results, we performed sensitivity analyses by repeating calculations in the subgroup of patients with a diagnosis of both HF and T2D.

### *Hospitalization for HF or CV death*

Data were available from eight trials including 11,365 patients with HF and T2D (7, 8, 27, 28, 30, 33, 37, 41, 62). A non-significant benefit with canagliflozin or sotagliflozin as compared to other SGLT2i was noted.

Accordingly, there was a non-significant benefit with non-selective over selective SGLT2i. However, confidence intervals are wide and results need to be interpreted with caution. The respective interval plots are shown in

**Online Figure 21** and **Online Figure 22**.

### ***All-cause mortality***

Data were available from 13 trials including 8,051 patients with HF and T2D (8, 27, 30, 31, 32, 34, 37, 41, 43). When compared to placebo, dapagliflozin improved survival. However, no significant differences in all-cause mortality were noted between individual SGLT2i. In addition, no difference in mortality reduction was noted between selective and non-selective SGLT2i. The respective interval plots are shown in **Online Figure 23** and **Online Figure 24: Predictive interval plot for SGLT2i classes with respect to all-cause mortality in subgroups of patients with both HF and T2D (sensitivity analysis)**.

### ***CV mortality***

Data were available from nine trials including 9,526 patients with HF and T2D (8, 26, 30, 31, 33, 37, 39, 41, 43). No significant differences in CV mortality were noted between individual SGLT2i or SGLT2i classes. The respective interval plots are shown in **Online Figure 25** and **Online Figure 26**.

### ***Hospitalization for HF***

Data were available from 14 trials including 11,795 patients with HF and T2D (8, 27, 28, 30, 33, 34, 37-39, 41, 43, 62). A non-significant benefit with canagliflozin or sotagliflozin as compared to other SGLT2i was noted. Accordingly, there was a non-significant benefit with non-selective over selective SGLT2i. However, confidence intervals are wide and results need to be interpreted with caution. The respective interval plots are shown in **Online Figure 27** and **Online Figure 28**.

### ***Worsening RF***

Data were available from four trials including 4,335 patients with HF and T2D (25, 30, 37, 41). No significant differences in worsening RF were noted between individual SGLT2i. The respective interval plot is shown in **Online Figure 29**. Due to missing data, comparisons of selective vs. non-selective SGLT2i were not possible.

### ***Worsening RF or CV death***

Data were available from three trials including 1,387 patients with HF and T2D (25, 30, 40). No significant differences in worsening RF or CV death were noted between individual SGLT2i. The respective interval plot is shown in **Online Figure 30**. Due to the low number of patients included in the analysis, however, results should be interpreted with caution. In addition, comparisons of selective vs. non-selective SGLT2i were not possible due to missing data.

## SUPPLEMENTARY FIGURES

**Online Figure 1:** Flow chart of trial identification and selection

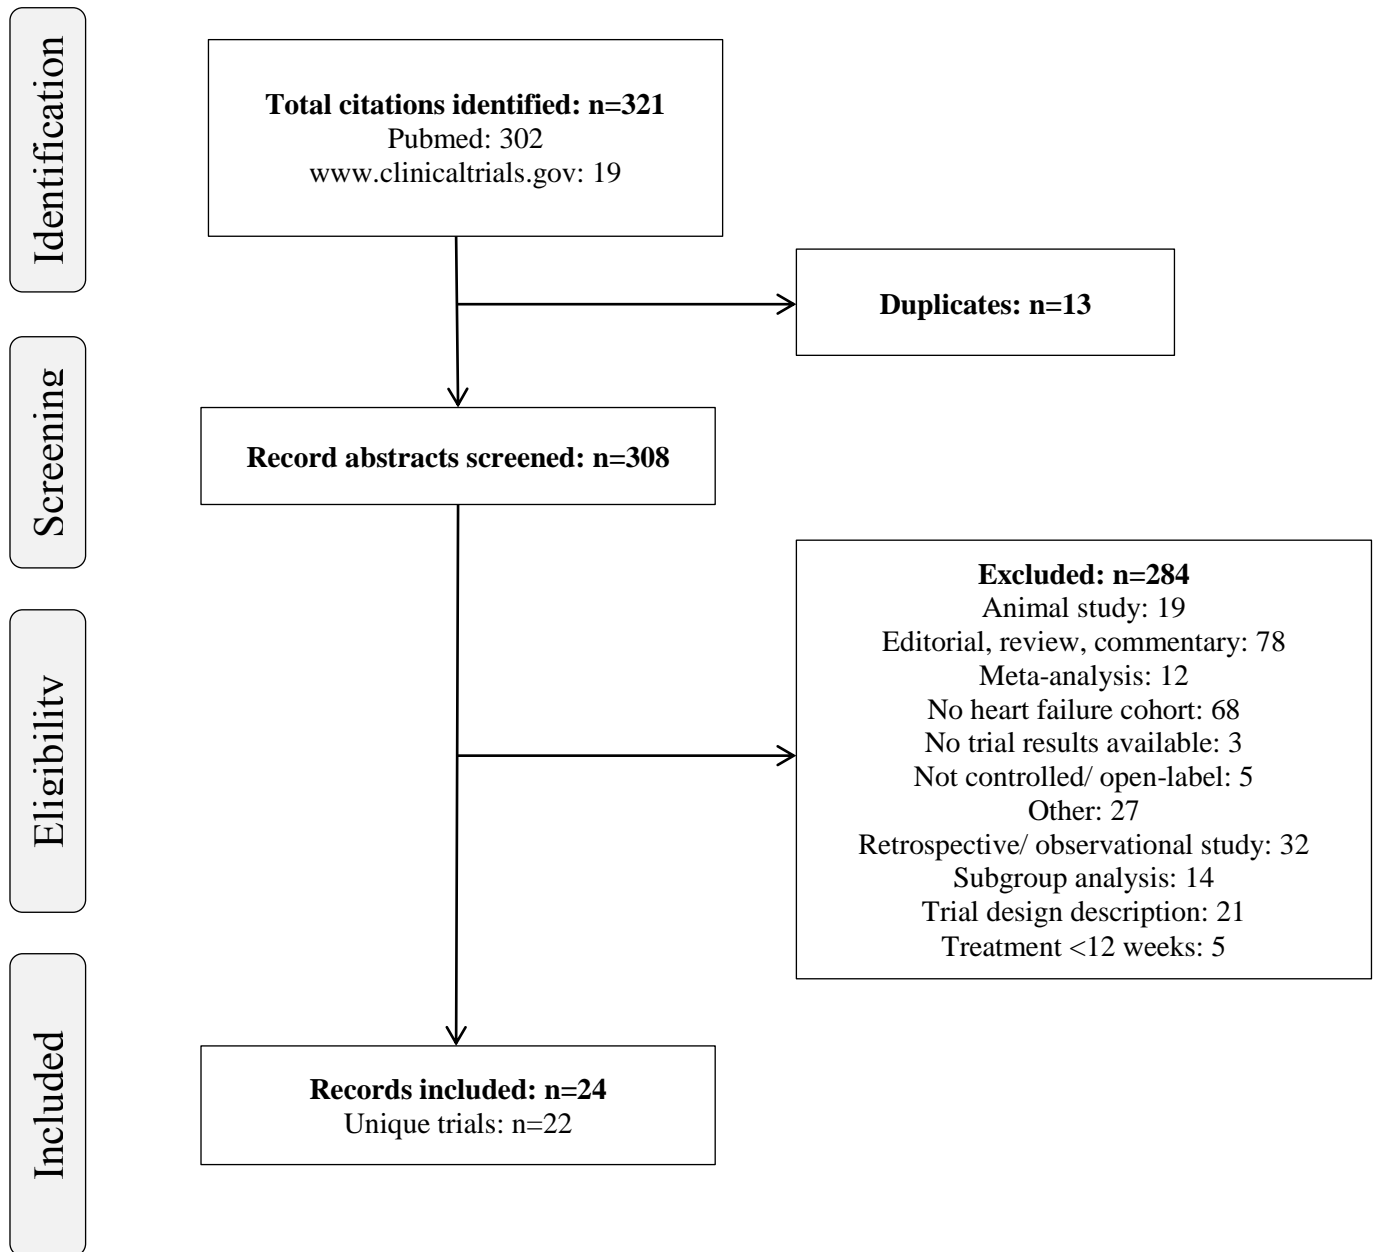

**Online Figure 2:** Network plots with respect to a) hospitalization for HF or CV death, b) all-cause mortality, c) cardiovascular mortality, d) hospitalization for HF, e) worsening RF, and f) worsening RF or CV death.

**a) hospitalization for HF or CV death**

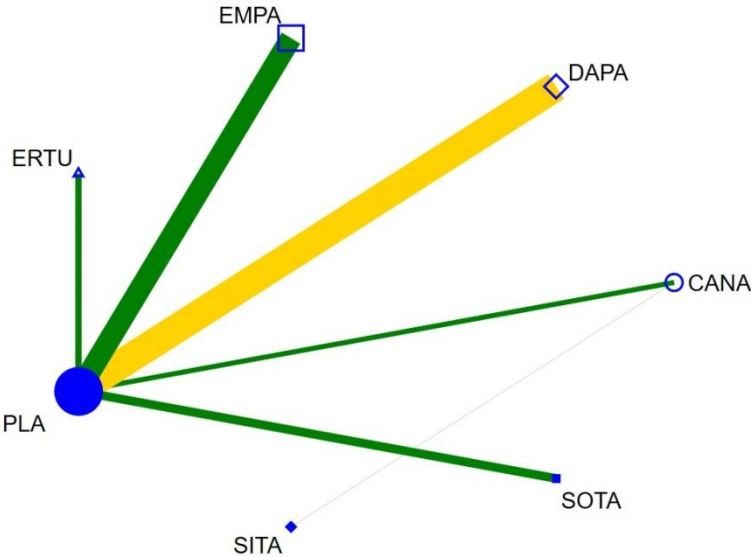

**b) all-cause mortality**

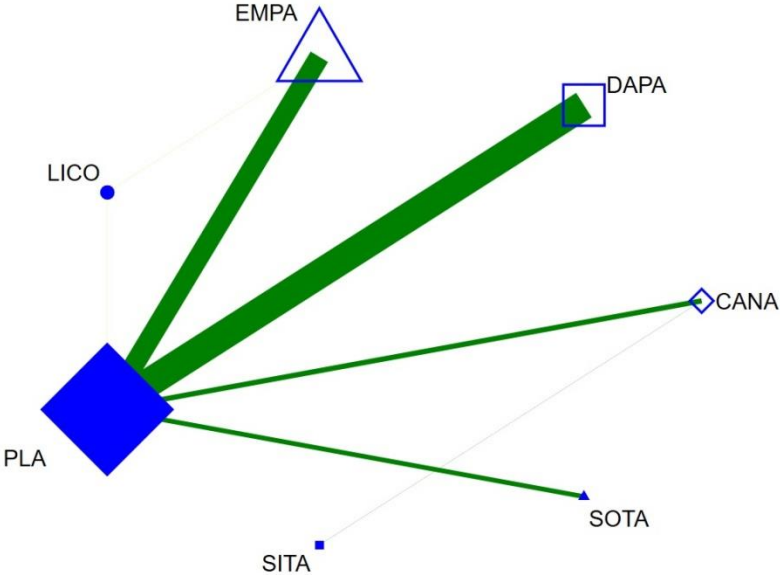

c) CV mortality

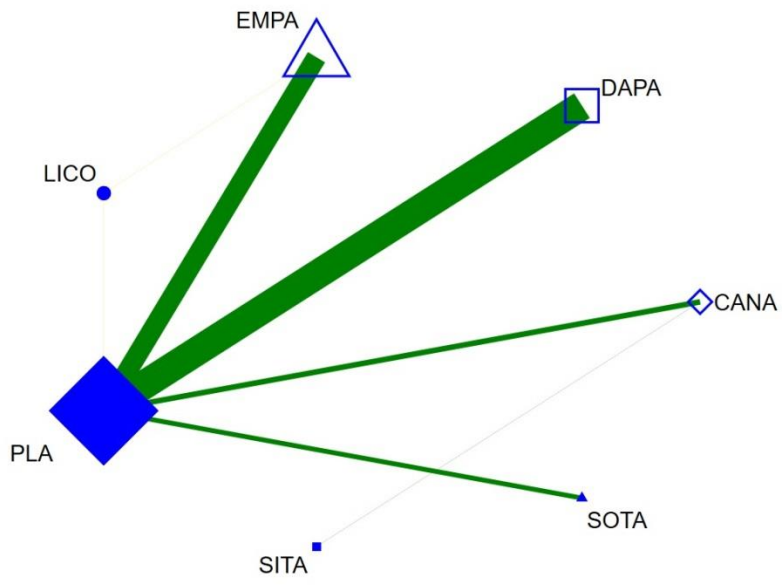

d) hospitalization for HF

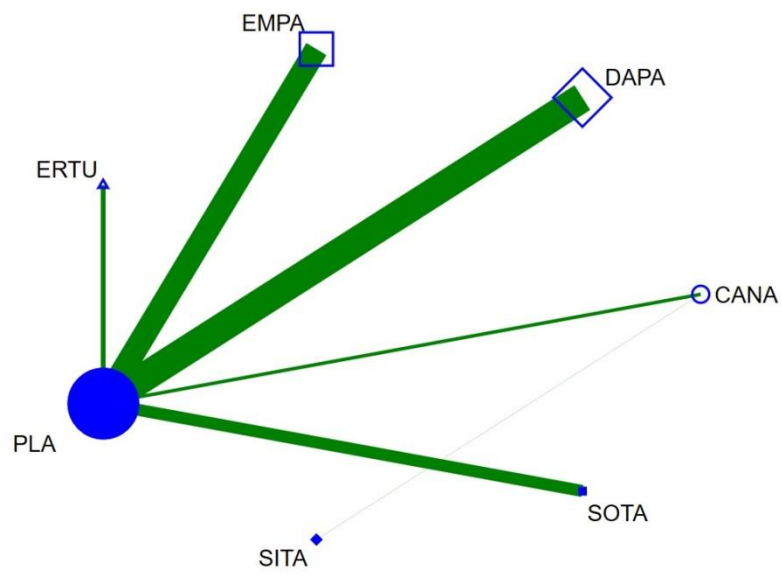



e) worsening RF

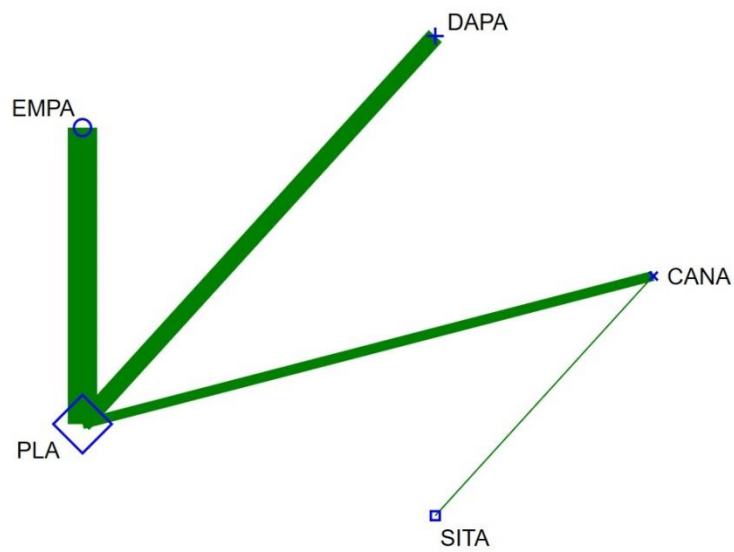

f) worsening RF or CV death

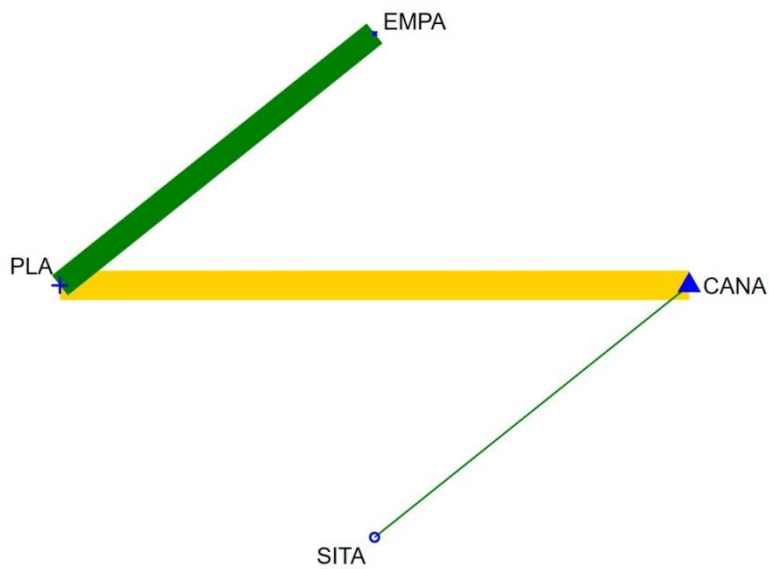

**Legend:** CANA, canagliflozin; CV, cardiovascular; DAPA, dapagliflozin; EMPA, empagliflozin; ERTU, ertugliflozin; HF, heart failure; LICO, licogliflozin; PLA, placebo; RF, renal function; SITA, sitagliptin; SOTA, sotagliflozin. Nodes and edges are weighted according to the number of trials including the respective interventions. Colored edges are employed to present

the risk of bias for each direct comparison in the network, with green, yellow and red colors being used to denote pairwise meta-analyses of low, unclear and high risk of bias.

**Online Figure 3:** Individual risk of bias assessment

| Record                        | Trial <sup>a</sup> | Random sequence generation (selection bias) | Allocation concealment (selection bias) | Blinding of participants and personnel (performance bias) | Blinding of outcome assessment (detection bias) | Intention-to-treat analysis (attrition bias) | Incomplete outcome data (attrition bias) | Groups balanced at baseline (selection bias) | Selective reporting (reporting bias) | Independent funding | Trials stopped early | Prospective clinical trial registration |
|-------------------------------|--------------------|---------------------------------------------|-----------------------------------------|-----------------------------------------------------------|-------------------------------------------------|----------------------------------------------|------------------------------------------|----------------------------------------------|--------------------------------------|---------------------|----------------------|-----------------------------------------|
| Bhatt (8)                     | SOLOIST-WHF        | ✔                                           | ✔                                       | ✔                                                         | ✔                                               | ✔                                            | ✔                                        | ✔                                            | ✔                                    | ✘                   | ✘                    | ✔                                       |
| Butler (25)                   | EMPA-REG           | ✘                                           | ✔                                       | ✔                                                         | ✔                                               | ✔                                            | ✔                                        | ✔                                            | ✔                                    | ✘                   | ✔                    | ✔                                       |
| Fitchett (26,27)              | OUTCOME            | ✘                                           | ✔                                       | ✔                                                         | ✔                                               | ✔                                            | ✔                                        | ✔                                            | ✔                                    | ✘                   | ✔                    | ✔                                       |
| Cannon (28), Cosentino (29)   | VERTIS CV          | ✘                                           | ✔                                       | ✔                                                         | ✔                                               | ✔                                            | ⚠                                        | ✔                                            | ✔                                    | ✘                   | ✔                    | ✔                                       |
| Carbone (30)                  | CANA-HF            | ✔                                           | ✔                                       | ✔                                                         | ✔                                               | ✔                                            | ✔                                        | ✔                                            | ✔                                    | ✘                   | ✔                    | ✔                                       |
| de Boer (31)                  |                    | ✔                                           | ✔                                       | ✔                                                         | ✔                                               | ✔                                            | ⚠                                        | ✘                                            | ⚠                                    | ✘                   | ✘                    | ✔                                       |
| Jensen (32)                   | EMPIRE-HF          | ✔                                           | ✔                                       | ✔                                                         | ✔                                               | ✔                                            | ✔                                        | ✔                                            | ✔                                    | ✔                   | ✔                    | ✔                                       |
| Kato (33)                     | DECLARE            | ✘                                           | ✔                                       | ✔                                                         | ✔                                               | ✔                                            | ⚠                                        | ⚠                                            | ⚠                                    | ✘                   | ✔                    | ✔                                       |
| Kosiborod (34)                |                    | ✘                                           | ✔                                       | ✔                                                         | ✔                                               | ✔                                            | ✔                                        | ✔                                            | ✔                                    | ✘                   | ✔                    | ✔                                       |
| Lee (35)                      | SUGAR-DM-HF        | ✔                                           | ✔                                       | ✔                                                         | ✔                                               | ✔                                            | ✔                                        | ✔                                            | ✔                                    | ✘                   | ✔                    | ✔                                       |
| McMurray (6, 36), Petrie (37) | DAPA-HF            | ✔                                           | ✔                                       | ✔                                                         | ✔                                               | ✔                                            | ✔                                        | ✔                                            | ✔                                    | ✘                   | ✔                    | ✔                                       |
| Nassif (38)                   | DEFINE-HF          | ✔                                           | ✔                                       | ✔                                                         | ✔                                               | ✔                                            | ✔                                        | ✔                                            | ✔                                    | ✘                   | ✔                    | ✔                                       |
| Packer (7), Anker (39)        | EMPEROR-Reduced    | ✔                                           | ✔                                       | ✔                                                         | ✔                                               | ✔                                            | ✔                                        | ✔                                            | ✔                                    | ✘                   | ✔                    | ✔                                       |
| Perkovic (40)                 | CREDENCE           | ✘                                           | ✔                                       | ✔                                                         | ✔                                               | ✔                                            | ⚠                                        | ⚠                                            | ⚠                                    | ✘                   | ✔                    | ✔                                       |
| Radholm (41)                  | CANVAS             | ✘                                           | ✔                                       | ✔                                                         | ✔                                               | ✔                                            | ✔                                        | ✔                                            | ⚠                                    | ✘                   | ✔                    | ✔                                       |
| Santos-Gallego (42)           | EMPA-TROPISM       | ✔                                           | ✔                                       | ✔                                                         | ✔                                               | ✔                                            | ✔                                        | ✔                                            | ✔                                    | ✔                   | ✔                    | ✔                                       |
| Singh (43)                    | REFORM             | ✔                                           | ✔                                       | ✔                                                         | ✔                                               | ✔                                            | ✔                                        | ✔                                            | ✔                                    | ✘                   | ✔                    | ✔                                       |
| Boehringer                    | EMPERIAL-Reduced   | ✔                                           | ✔                                       | ✔                                                         | ✔                                               | ✔                                            | ✘                                        | ⚠                                            | ⚠                                    | ✘                   | ✔                    | ✔                                       |
| Boehringer                    | EMPERIAL-Preserved | ✔                                           | ✔                                       | ✔                                                         | ✔                                               | ✔                                            | ✘                                        | ⚠                                            | ⚠                                    | ✘                   | ✔                    | ✔                                       |

**Legend:** <sup>a</sup> Trial acronym/ short title.

**Online Figure 4:** Comparison funnel plot for the composite of hospitalization for HF or CV death

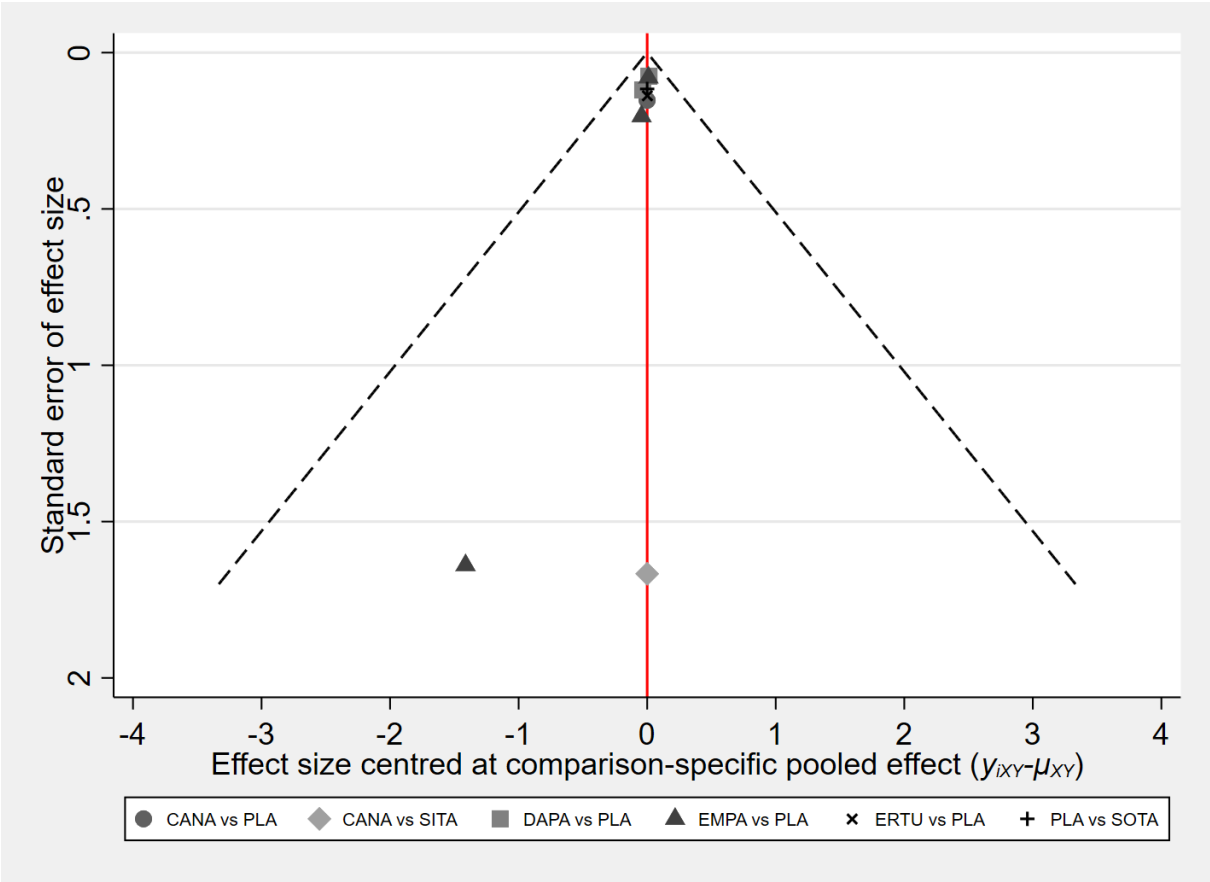

**Legend:** CANA, canagliflozin; CV, cardiovascular; DAPA, dapagliflozin; EMPA, empagliflozin; ERTU, ertugliflozin; HF, heart failure; PLA, placebo; SITA, sitagliptin; SOTA, sotagliflozin.

**Online Figure 5:** Predictive interval plot of individual SGLT2i for hospitalization all-cause mortality

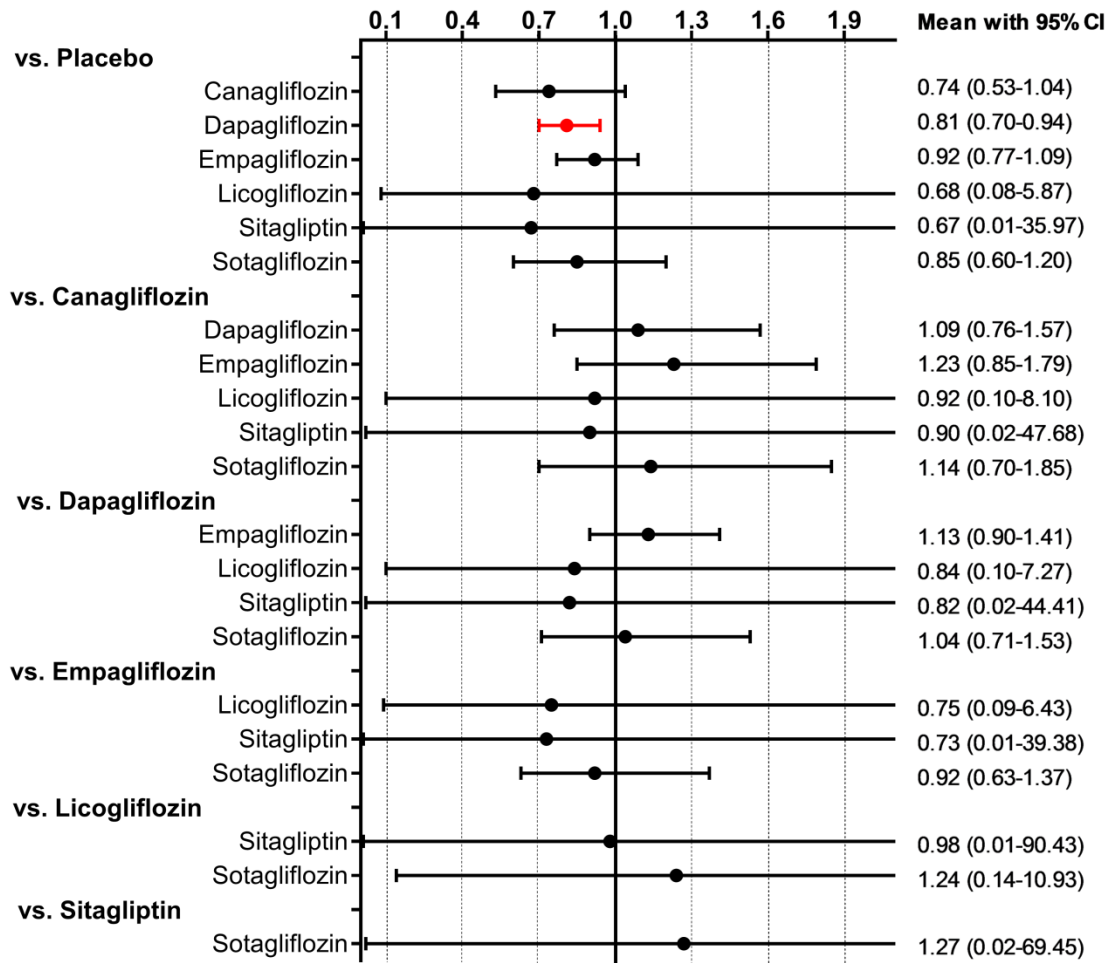

**Legend:** CI, confidence interval; SGLT2i, sodium-glucose cotransporter 2 inhibitor. The predictive interval plot represents a forest plot of the joint estimated summary effects from both direct and indirect comparisons along with their confidence intervals. Significant summary effects are shown in red.

**Online Figure 6:** Graphical ranking of SGLT2i based on SUCRA values (all-cause mortality)

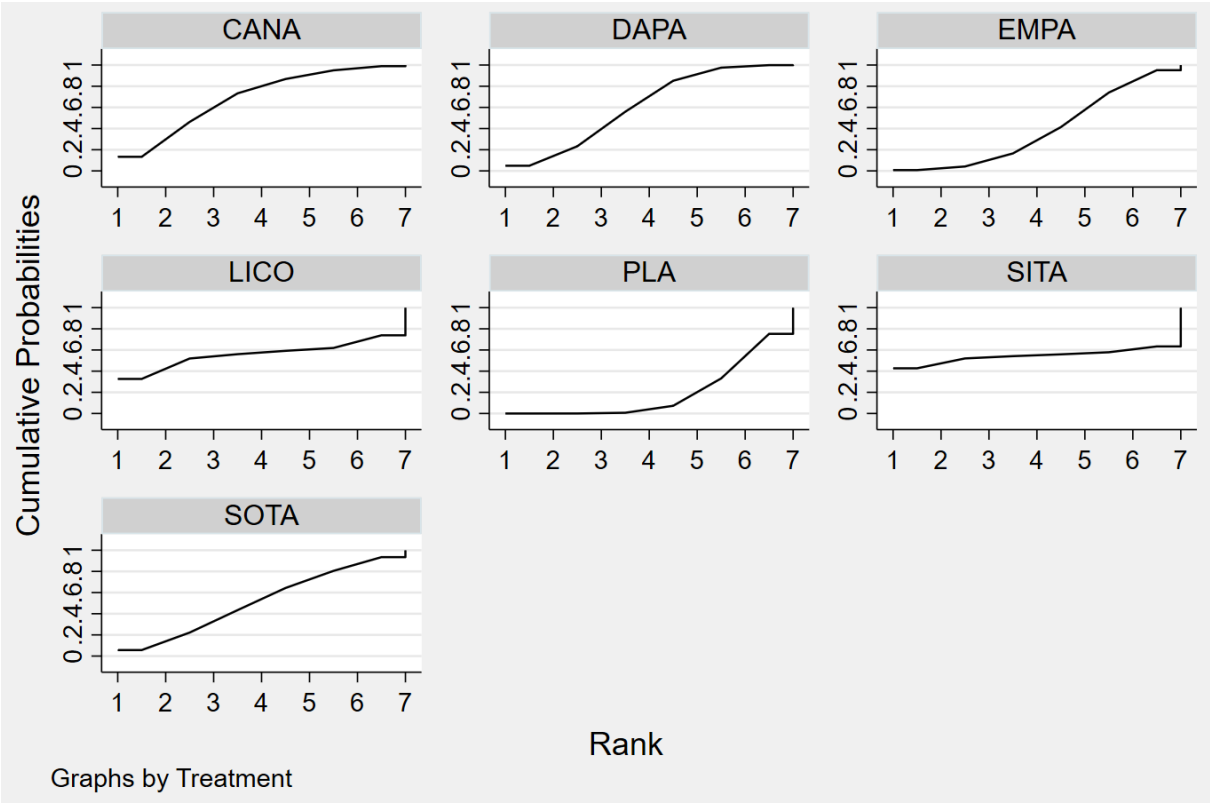

**Legend:** CANA, canagliflozin; DAPA, dapagliflozin; EMPA, empagliflozin, LICO, licogliflozin; PLA, placebo, SITA, sitagliptin, SOTA, sotagliflozin.

**Online Figure 7:** Predictive interval plot of SGLT2i classes for all-cause mortality

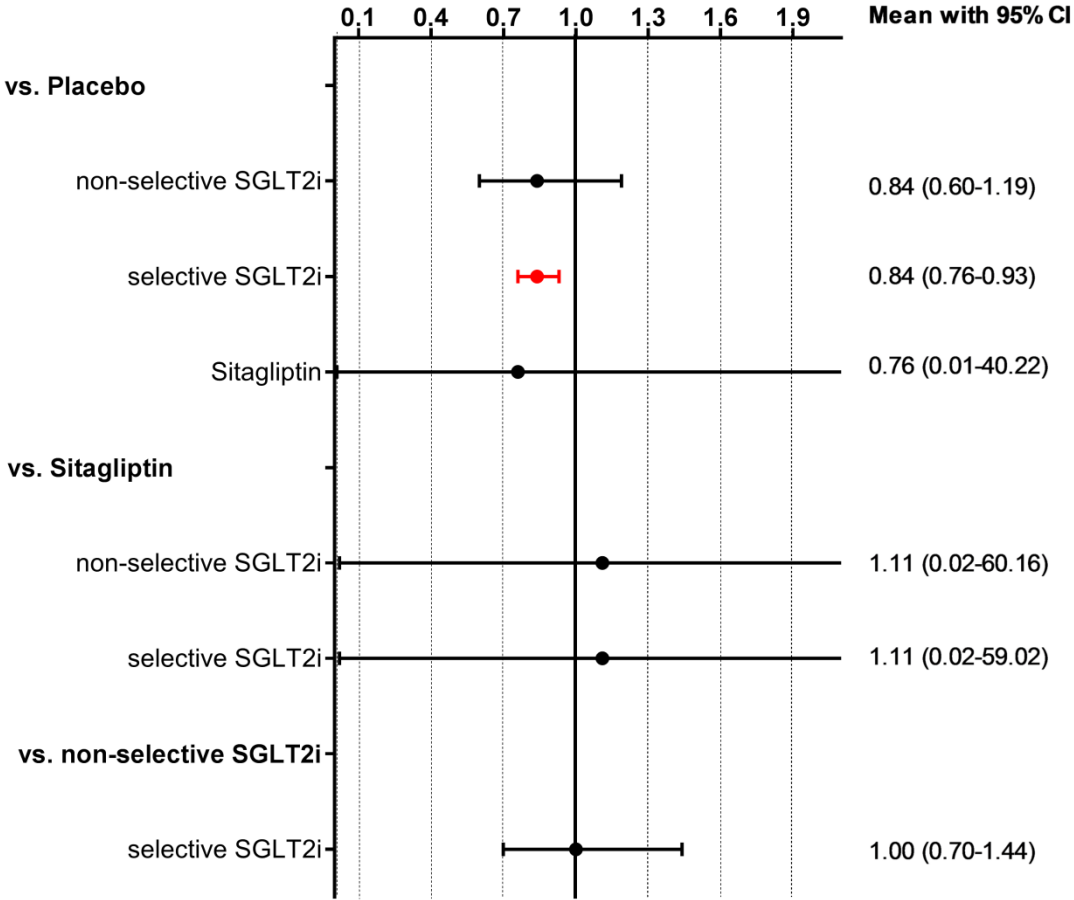

**Legend:** CI, confidence interval; SGLT2i, sodium-glucose cotransporter 2 inhibitor. The predictive interval plot represents a forest plot of the joint estimated summary effects from both direct and indirect comparisons along with their confidence intervals. Significant summary effects are shown in red.

**Online Figure 8:** Relationship between effect size and receptor selectivity of SGLT2i for all-cause mortality

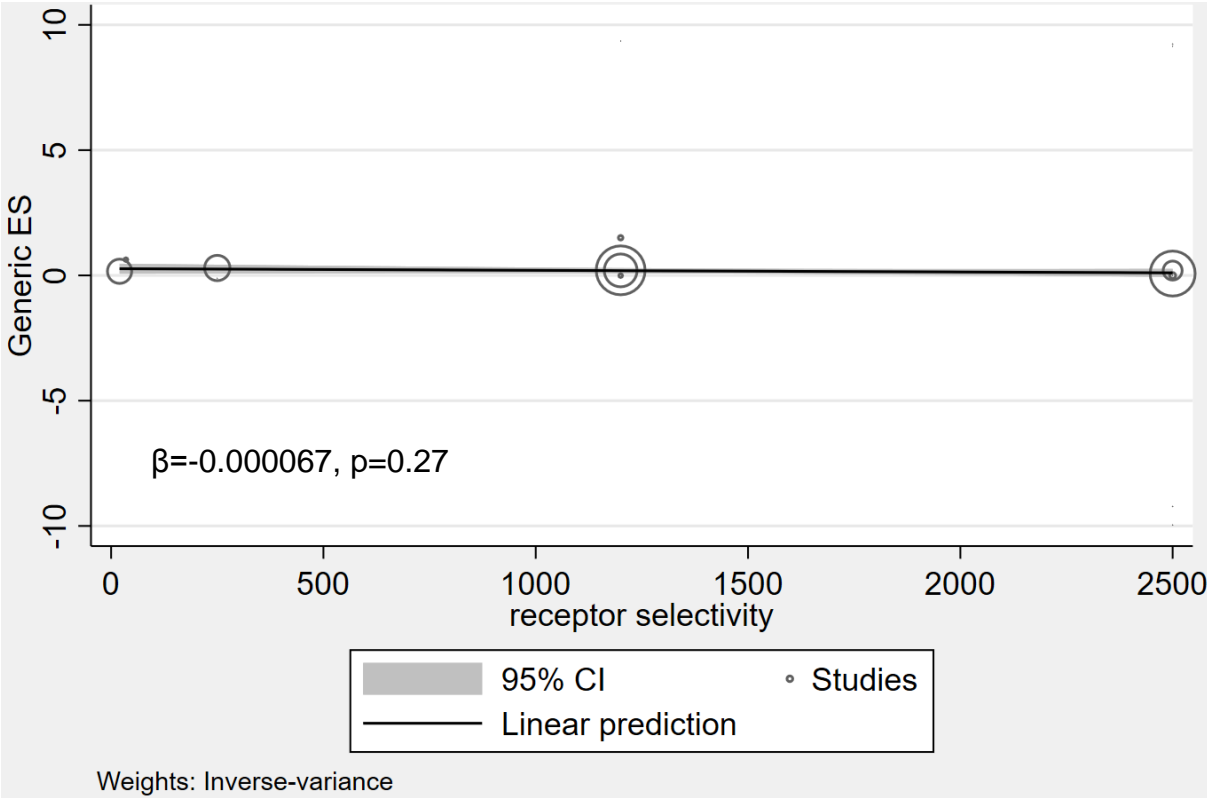

**Legend:** CI, confidence interval; ES, effect size; SGLT2i, sodium-glucose cotransporter 2 inhibitor. Each bubble represents a SGLT2i trial. The symbol size represents the sample size of the respective trials.



**Online Figure 9:** Predictive interval plot of individual SGLT2i classes for CV mortality

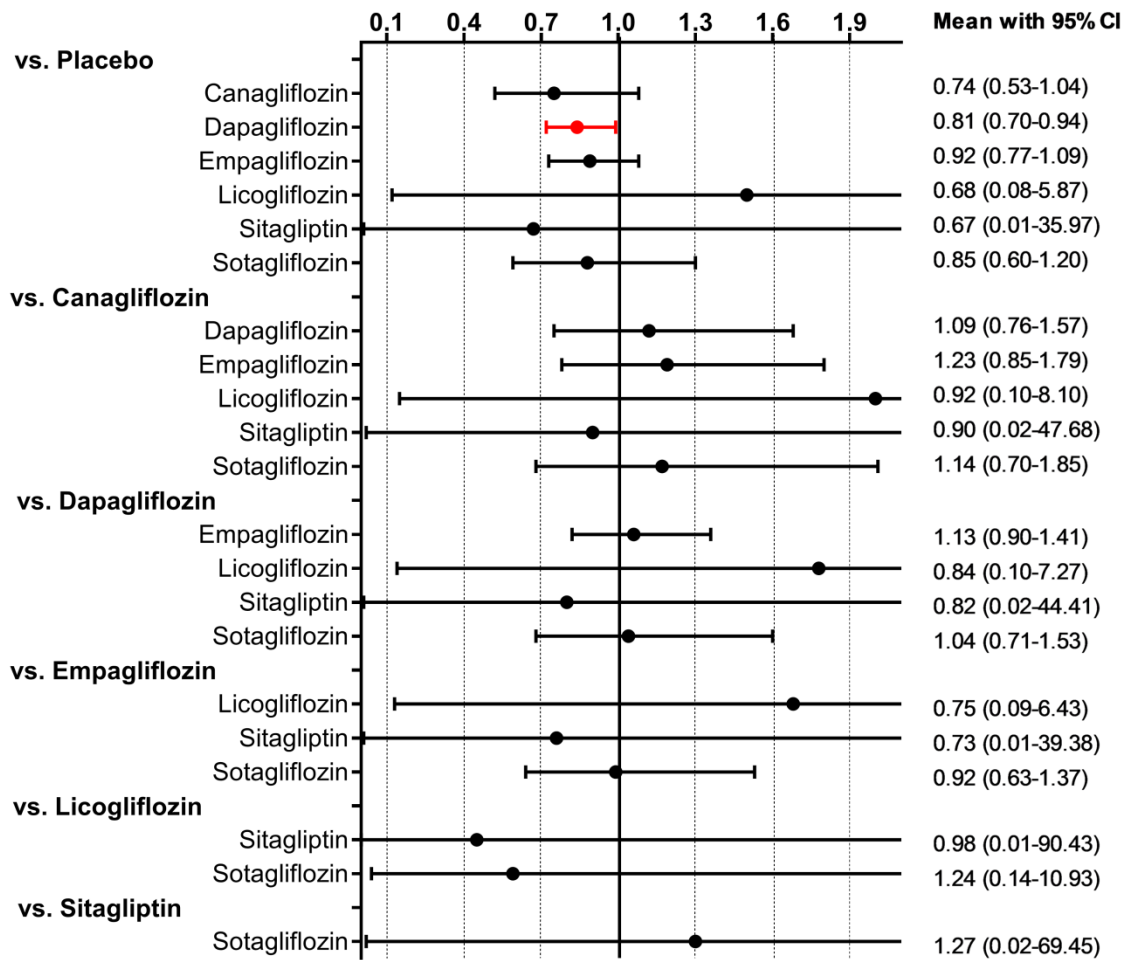

**Legend:** CI, confidence interval; CV, cardiovascular, SGLT2i, sodium-glucose cotransporter 2 inhibitor

**Online Figure 10:** Graphical ranking of SGLT2i based on SUCRA values (CV mortality)

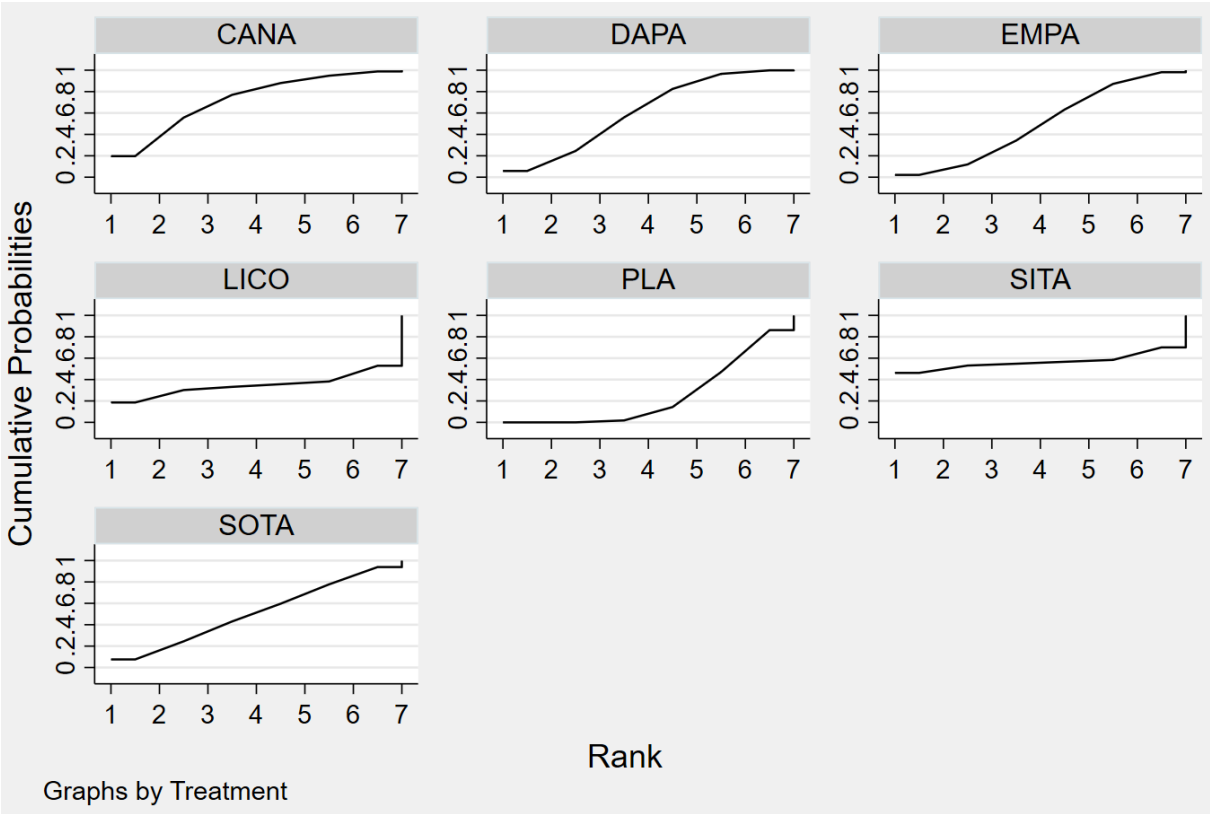

**Legend:** CANA, canagliflozin; CV, cardiovascular; DAPA, dapagliflozin; EMPA, empagliflozin, LICO, licogliflozin; PLA, placebo; SITA, sitagliptin, SOTA, sotagliflozin.

**Online Figure 11:** Predictive interval plot of SGLT2i classes for CV mortality

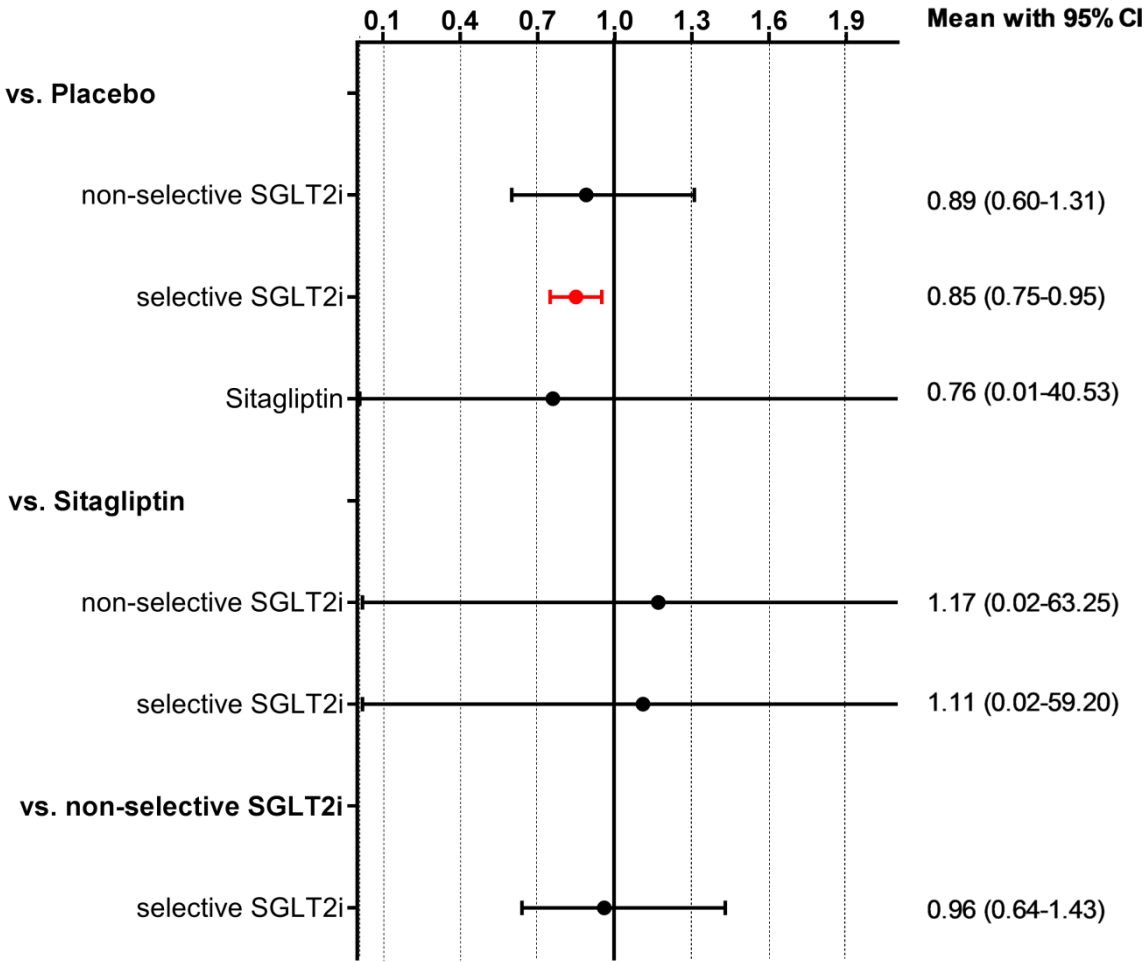

**Legend:** CI, confidence interval; CV, cardiovascular; SGLT2i, sodium-glucose cotransporter 2 inhibitor

Online Figure 12: Relationship between effect size and receptor selectivity of SGLT2i for CV mortality

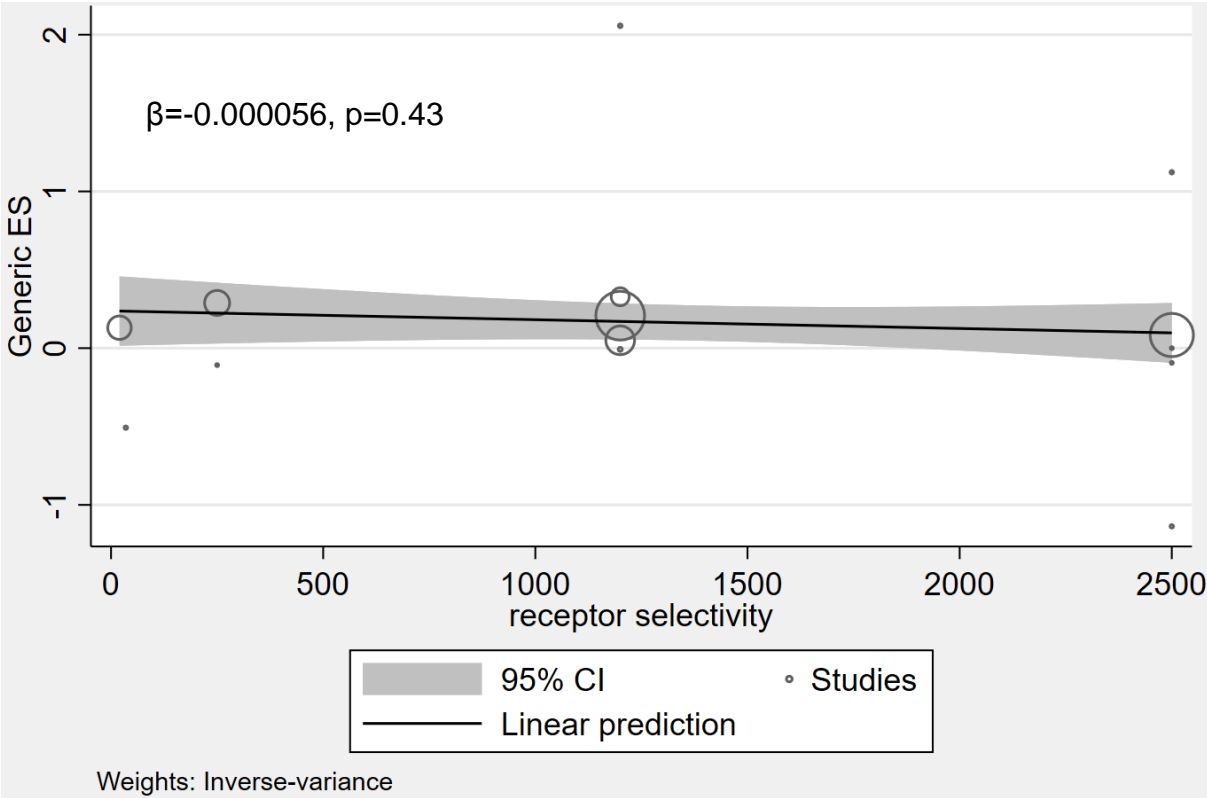

Legend: CI, confidence interval; CV, cardiovascular; ES, effect size.

**Online Figure 13:** Predictive interval plot of individual SGLT2i for hospitalization for HF

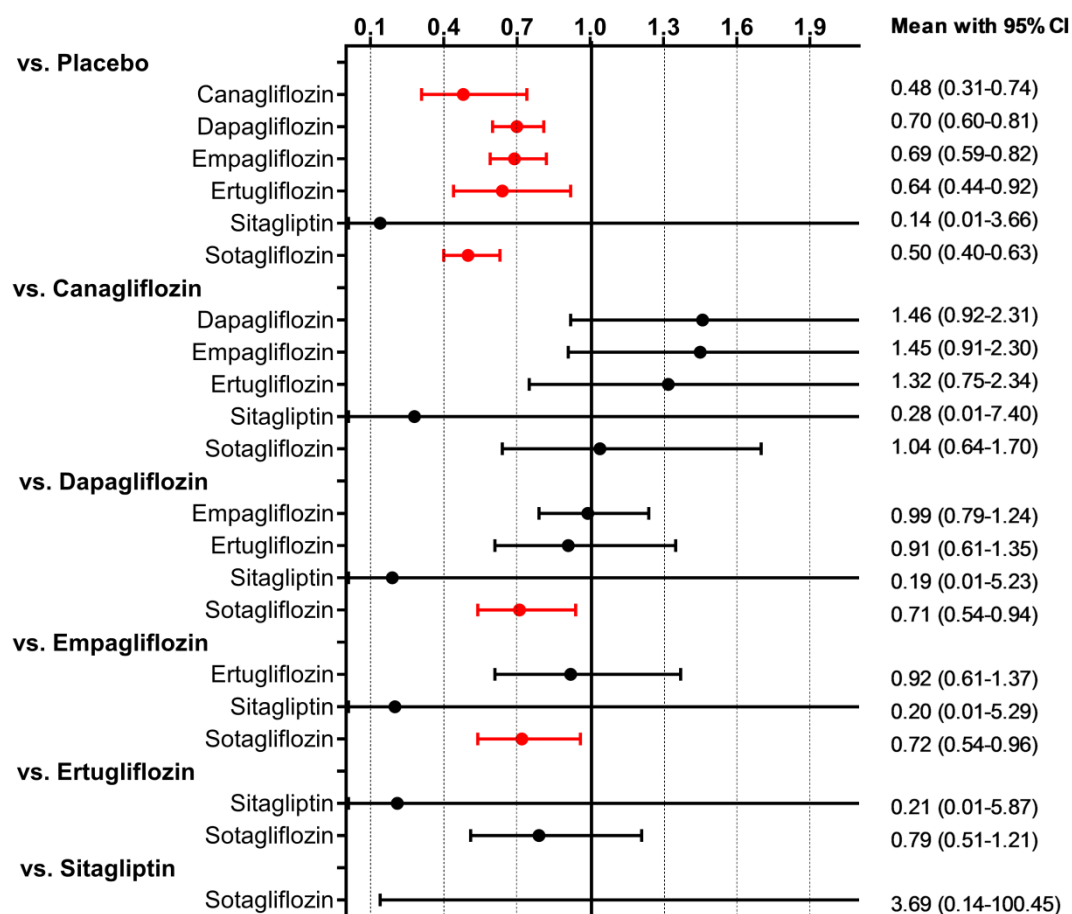

**Legend:** CI, confidence interval; HF, heart failure; SGLT2i, sodium-glucose cotransporter 2 inhibitor.

**Online Figure 14:** Graphical ranking of SGLT2i based on SUCRA values (hospitalization for HF)

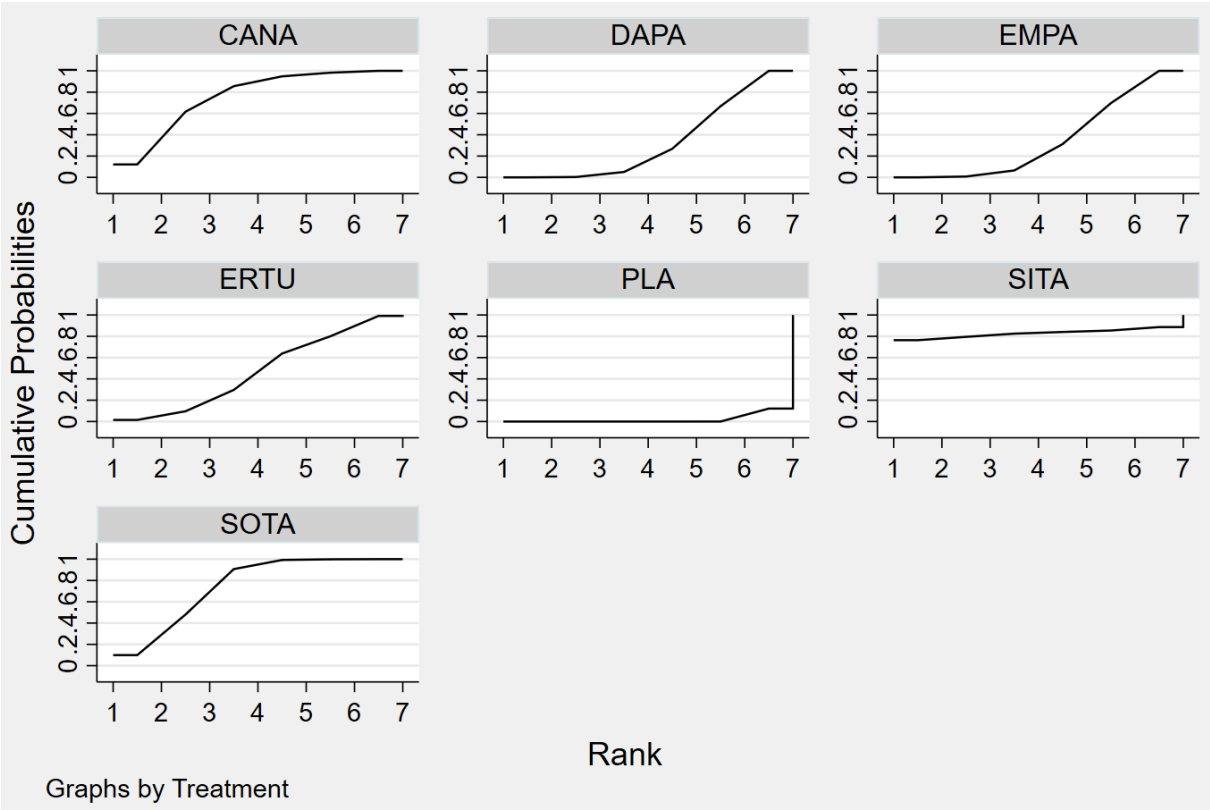

**Legend:** CANA, canagliflozin; DAPA, dapagliflozin; EMPA, empagliflozin, ERTU, ertugliflozin; HF, heart failure, PLA, placebo; SITA, sitagliptin, SOTA, sotagliflozin.

**Online Figure 15:** Predictive interval plot of SGLT2i classes for hospitalizations for HF

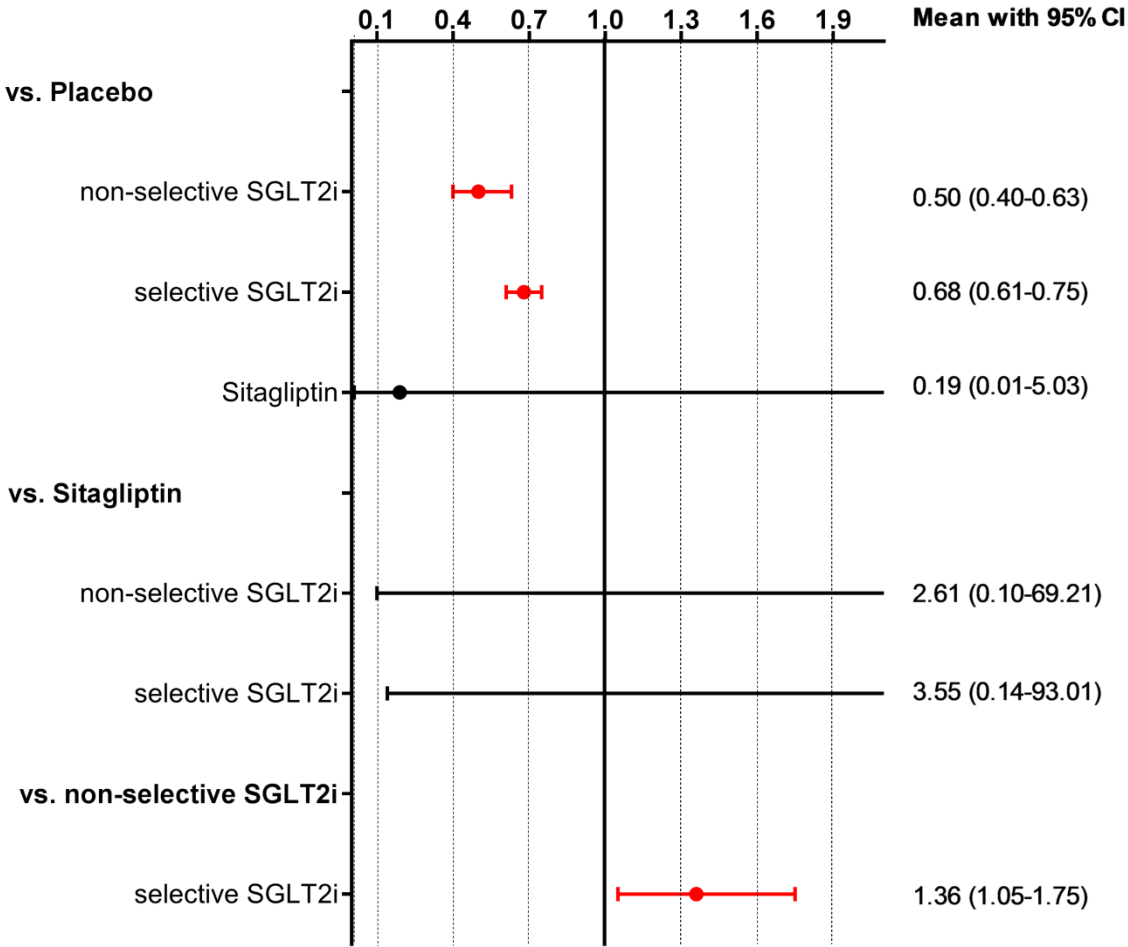

**Legend:** CI, confidence interval; HF, heart failure; SGLT2i, sodium-glucose cotransporter 2 inhibitor.

**Online Figure 16:** Relationship between effect size and receptor selectivity of SGLT2i for hospitalizations for HF

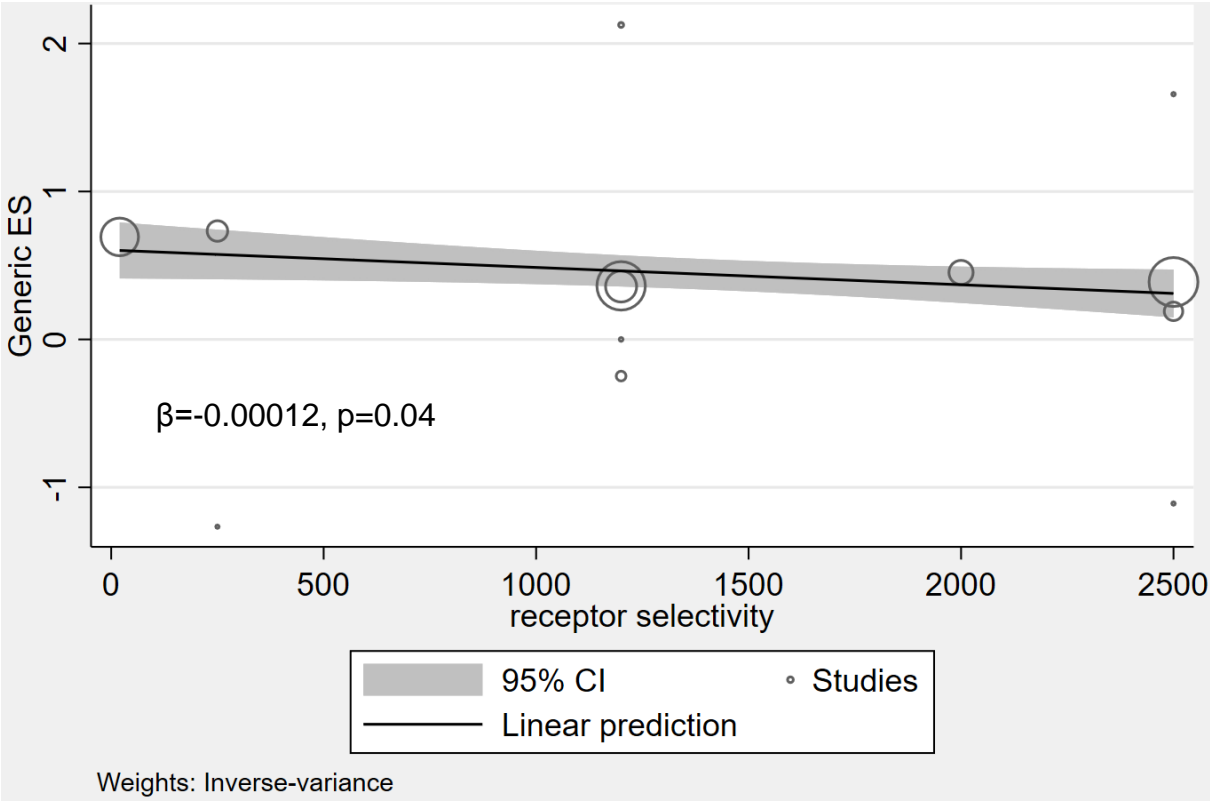

**Legend:** CI, confidence interval; ES, effect size; SGLT2i, sodium-glucose cotransporter 2 inhibitor.



**Online Figure 17: Predictive interval plot for worsening RF**

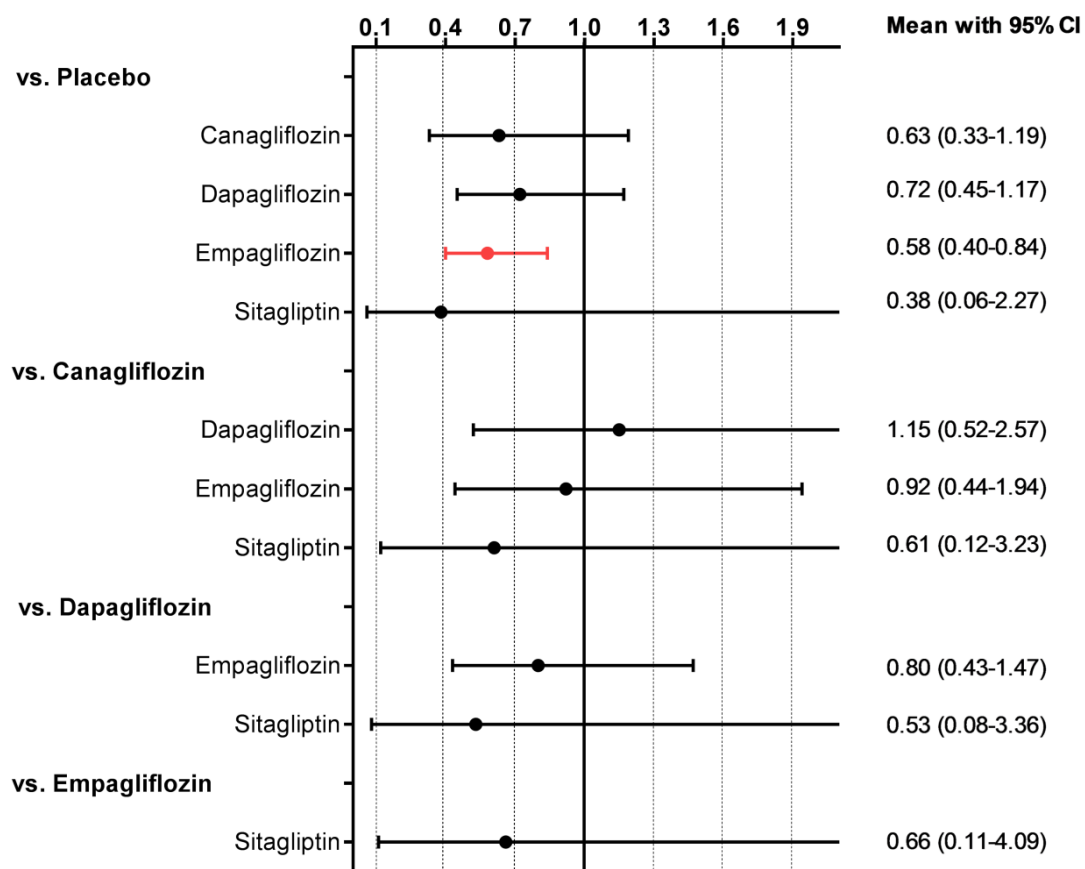

**Legend:** CI, confidence interval; RF, renal function.

**Online Figure 18:** Graphical ranking of SGLT2i based on SUCRA values (worsening RF)

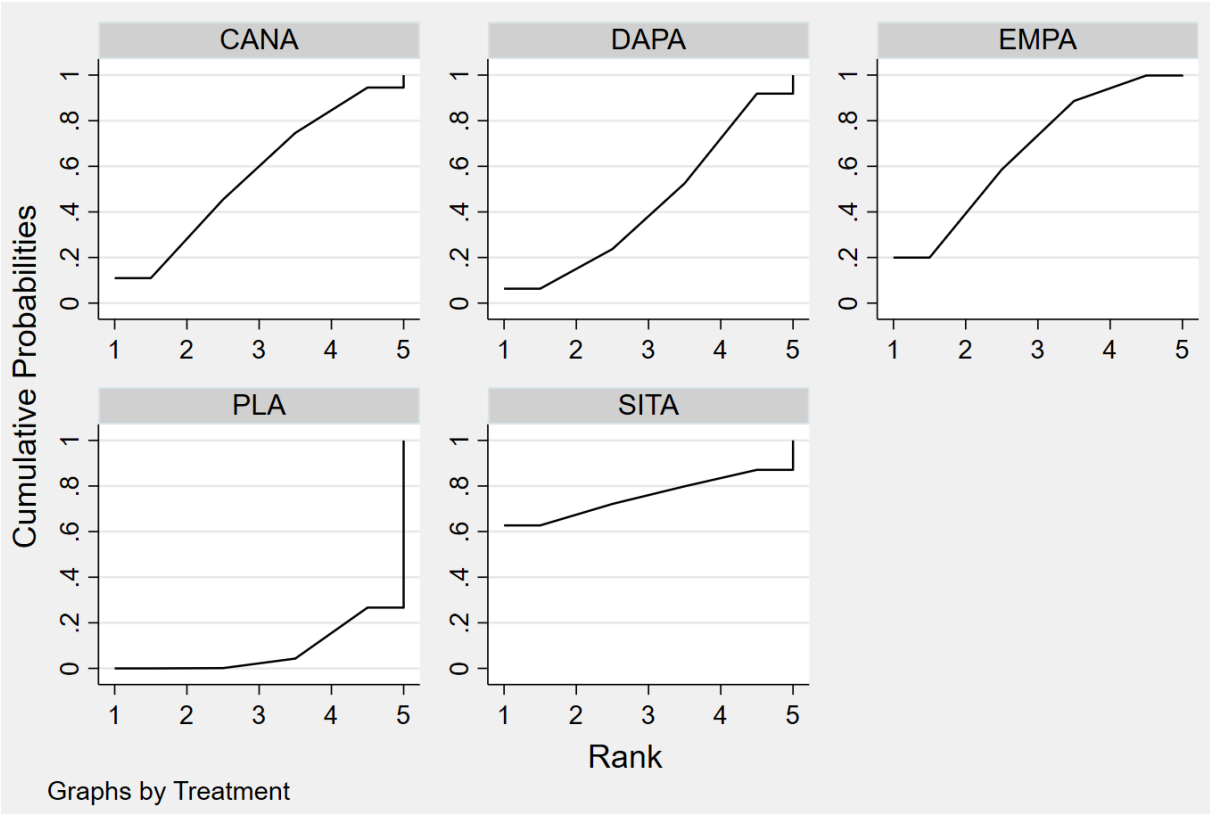

**Legend:** CANA, canagliflozin; DAPA, dapagliflozin; EMPA, empagliflozin, RF, renal function, PLA, placebo; SITA, sitagliptin

Online Figure 19: Relationship between effect size and receptor selectivity of SGLT2i for worsening RF

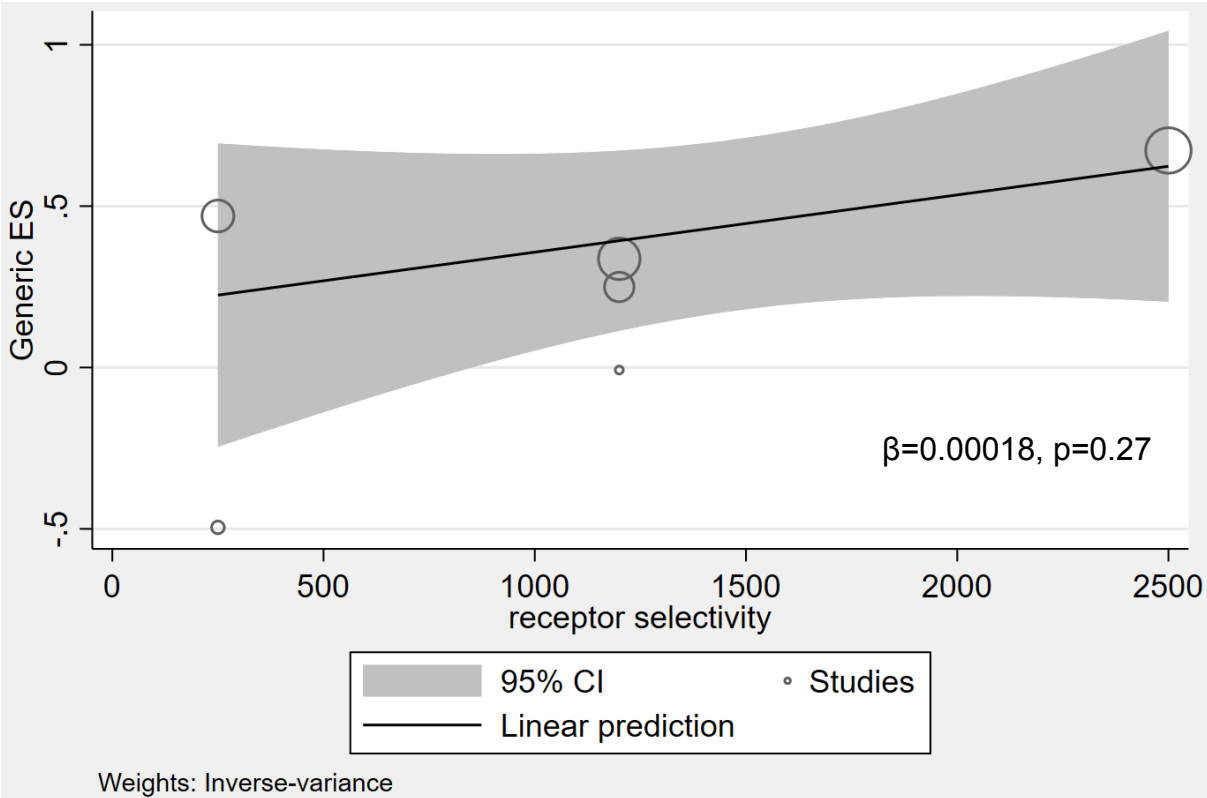

Legend: CI, confidence interval; EF, effect size; RF, renal function.

**Online Figure 20:** Predictive interval plot for worsening RF or CV death

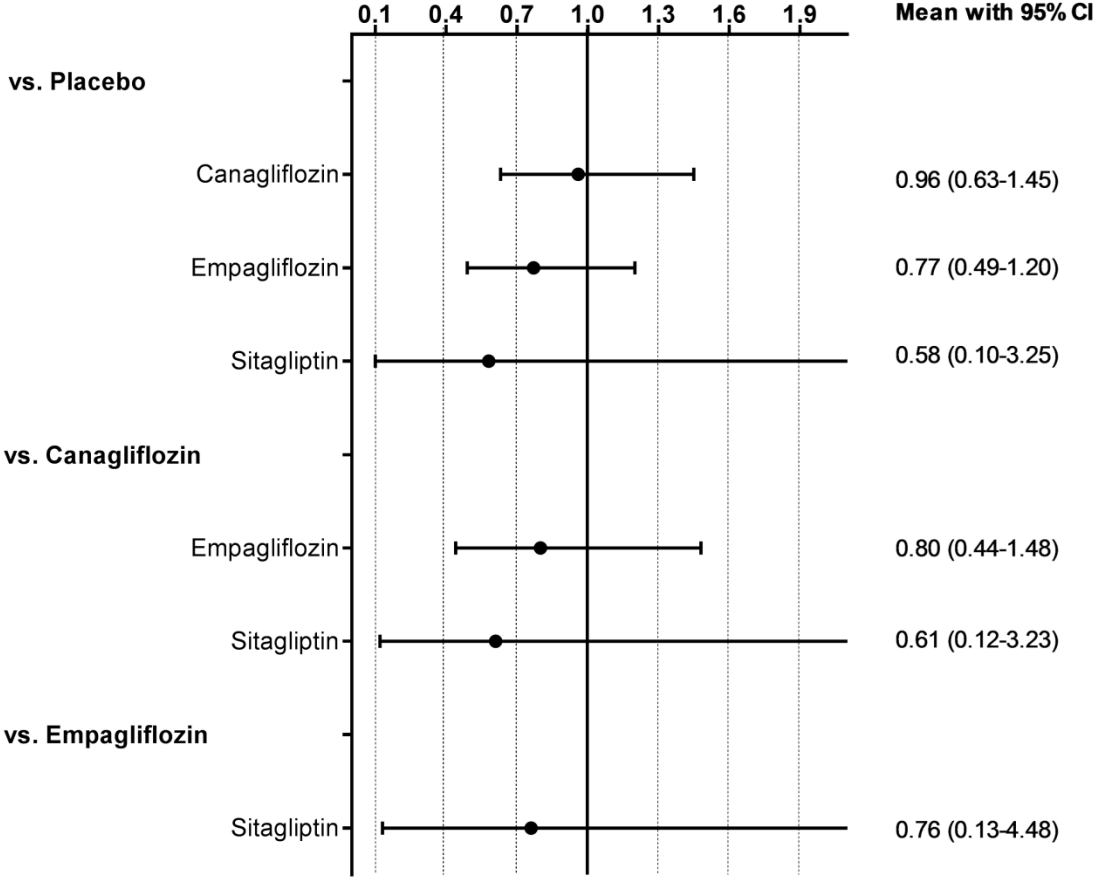

**Legend:** CI, confidence interval; CV, cardiovascular; RF, renal function.

**Online Figure 21:** Predictive interval plot for hospitalization for HF or CV death in subgroups of patients with both HF and T2D (sensitivity analysis)

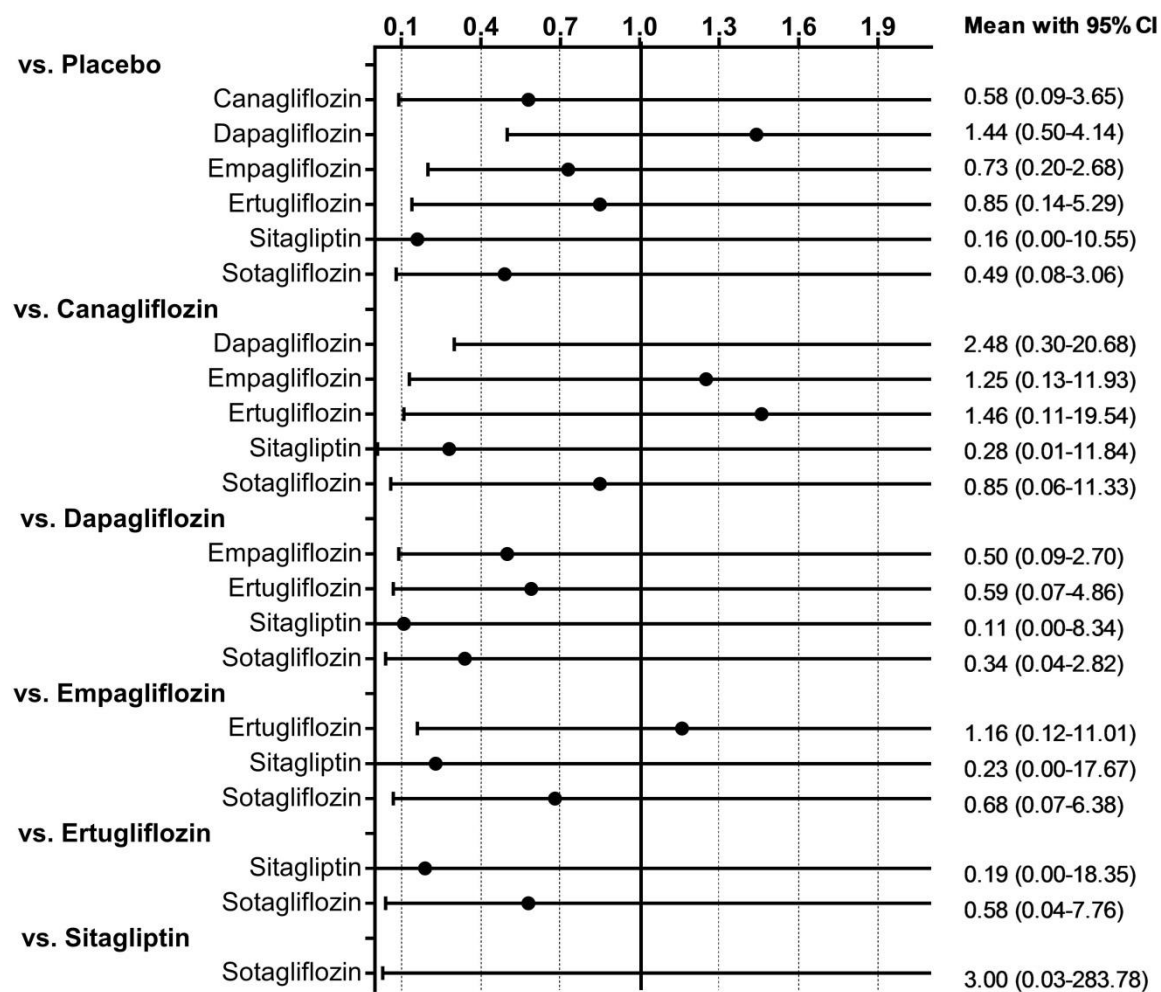

**Legend:** CV, cardiovascular; HF, heart failure; T2D, type 2 diabetes mellitus

**Online Figure 22:** Predictive interval plot for SGLT2i classes with respect to hospitalization for HF or CV death in subgroups of patients with both HF and T2D (sensitivity analysis)

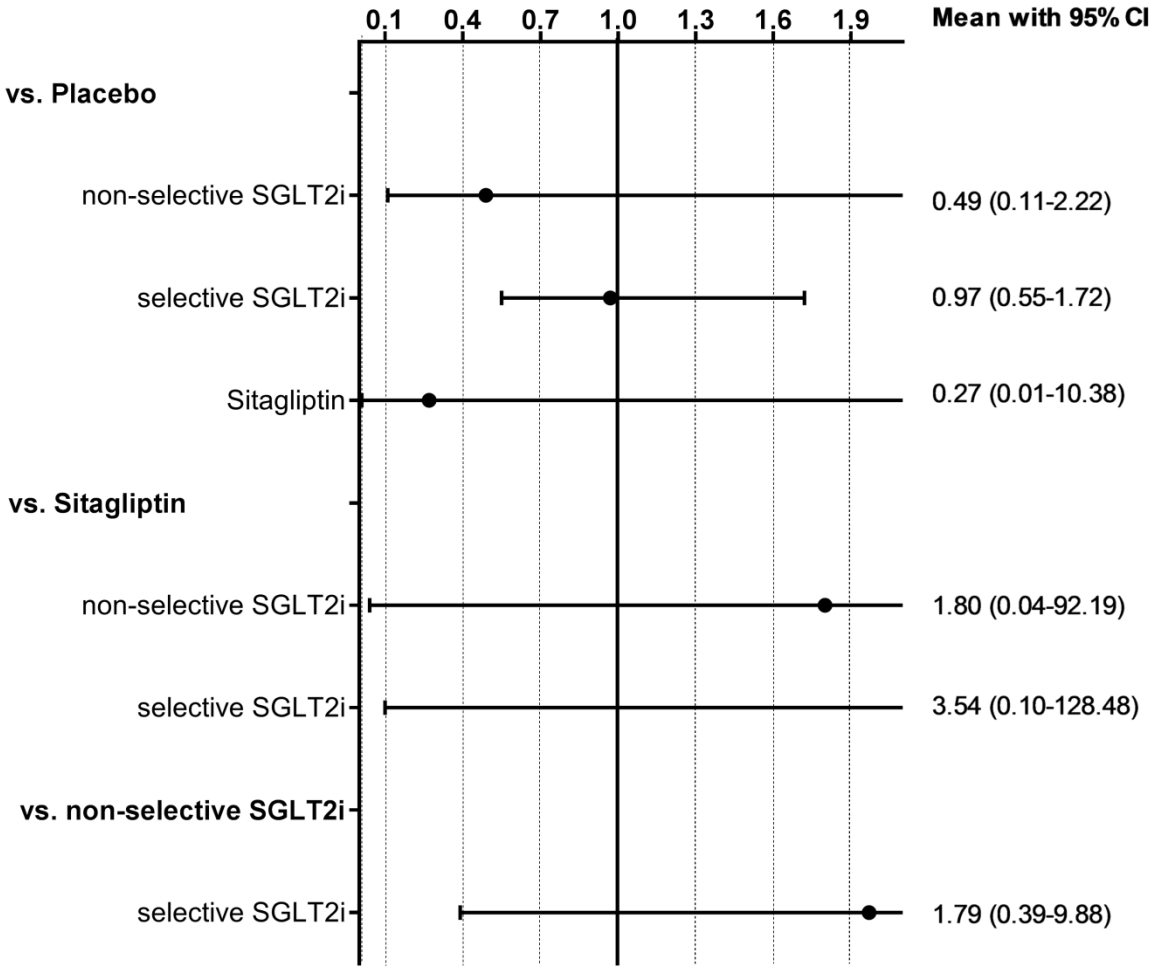

**Legend:** CI, confidence interval; CV, cardiovascular; HF, heart failure, T2D, type 2 diabetes mellitus; SGLT2i, sodium-glucose cotransporter 2 inhibitor.

**Online Figure 23:** Predictive interval plot for all-cause mortality in subgroups of patients with both HF and T2D (sensitivity analysis)

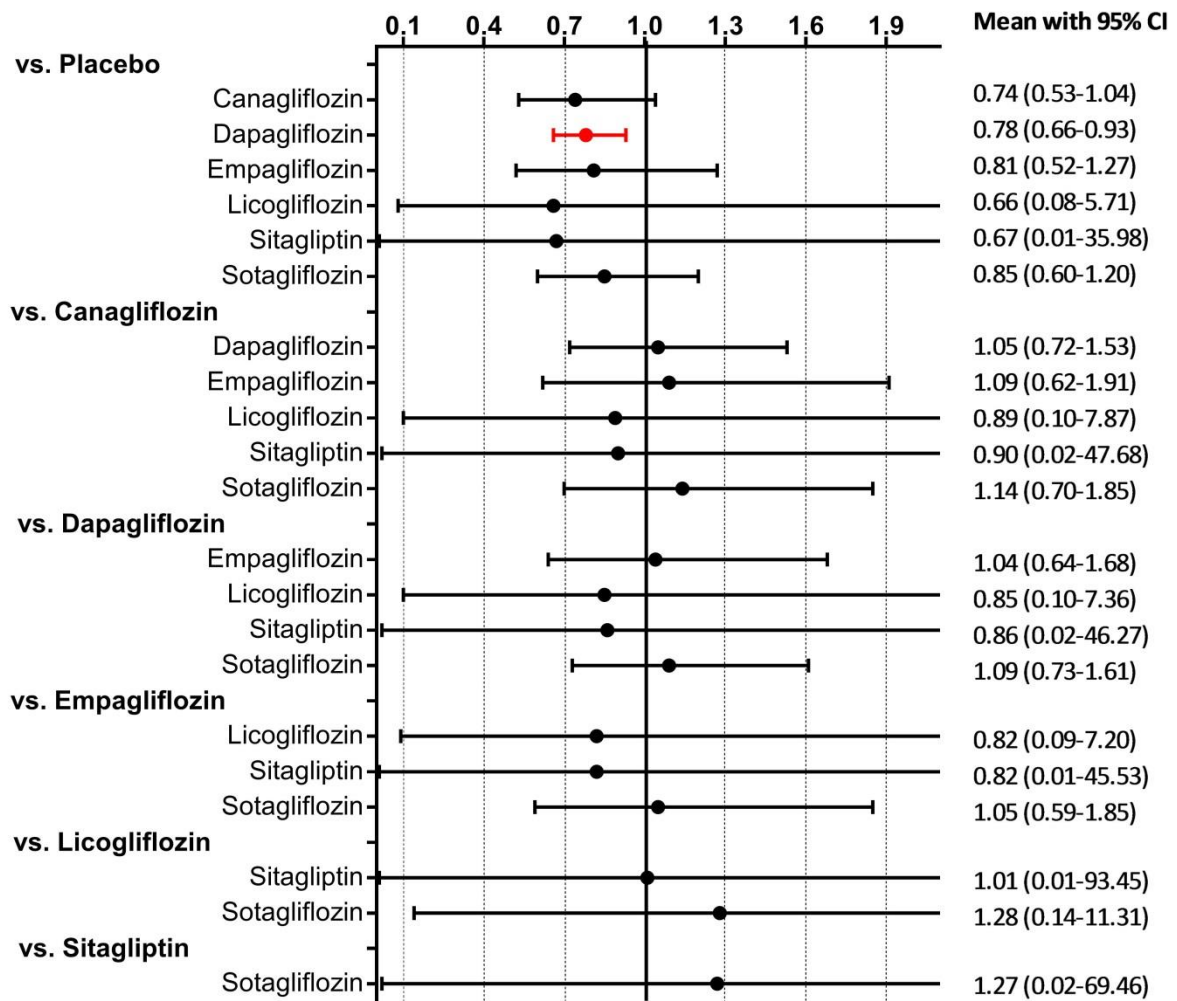

**Legend:** CI, confidence interval; HF, heart failure; T2D, type 2 diabetes mellitus. Significant summary effects are shown in red.

**Online Figure 24:** Predictive interval plot for SGLT2i classes with respect to all-cause mortality in subgroups of patients with both HF and T2D (sensitivity analysis)

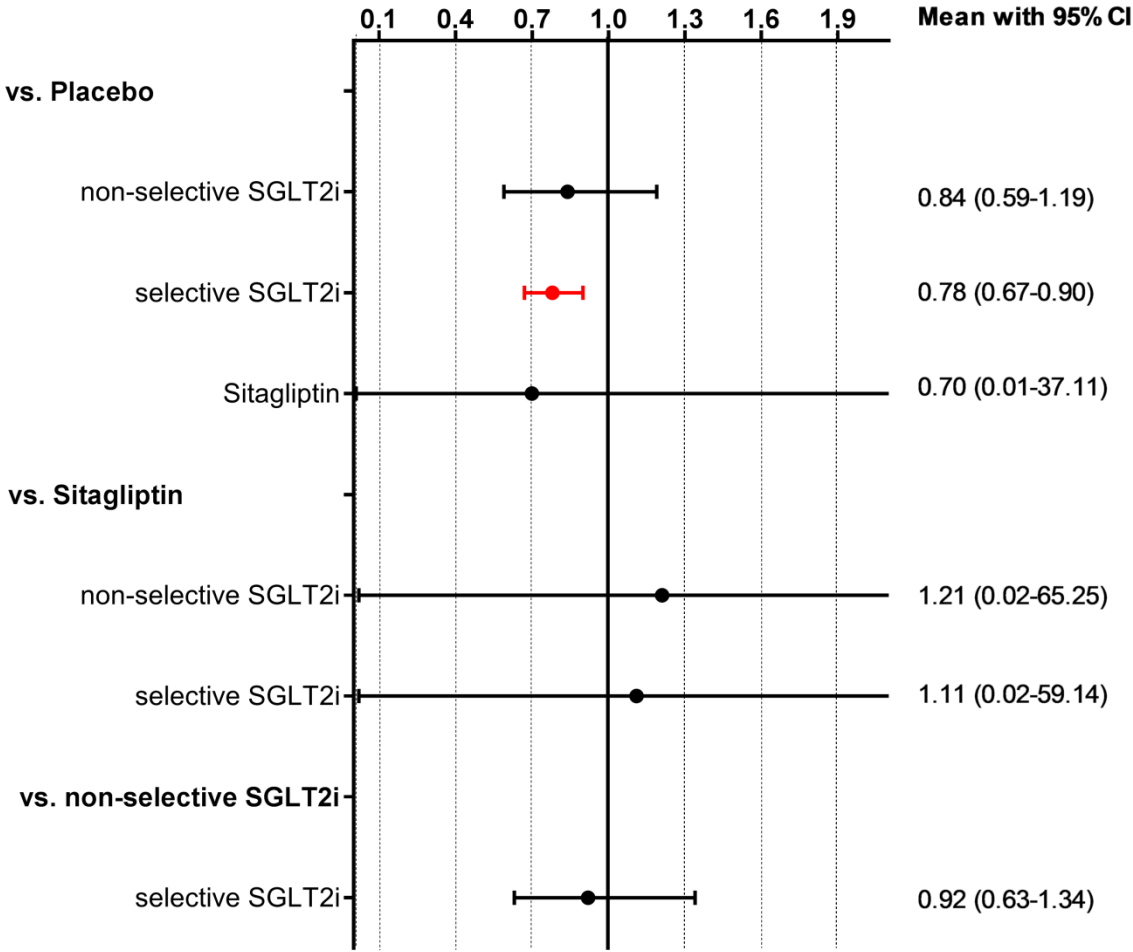

**Legend:** CI, confidence interval; HF, heart failure; SGLT2i, sodium-glucose cotransporter 2 inhibitor; T2D, type 2 diabetes mellitus. Significant results are shown in red color.



**Online Figure 25:** Predictive interval plot for CV mortality in subgroups of patients with both HF and T2D (sensitivity analysis)

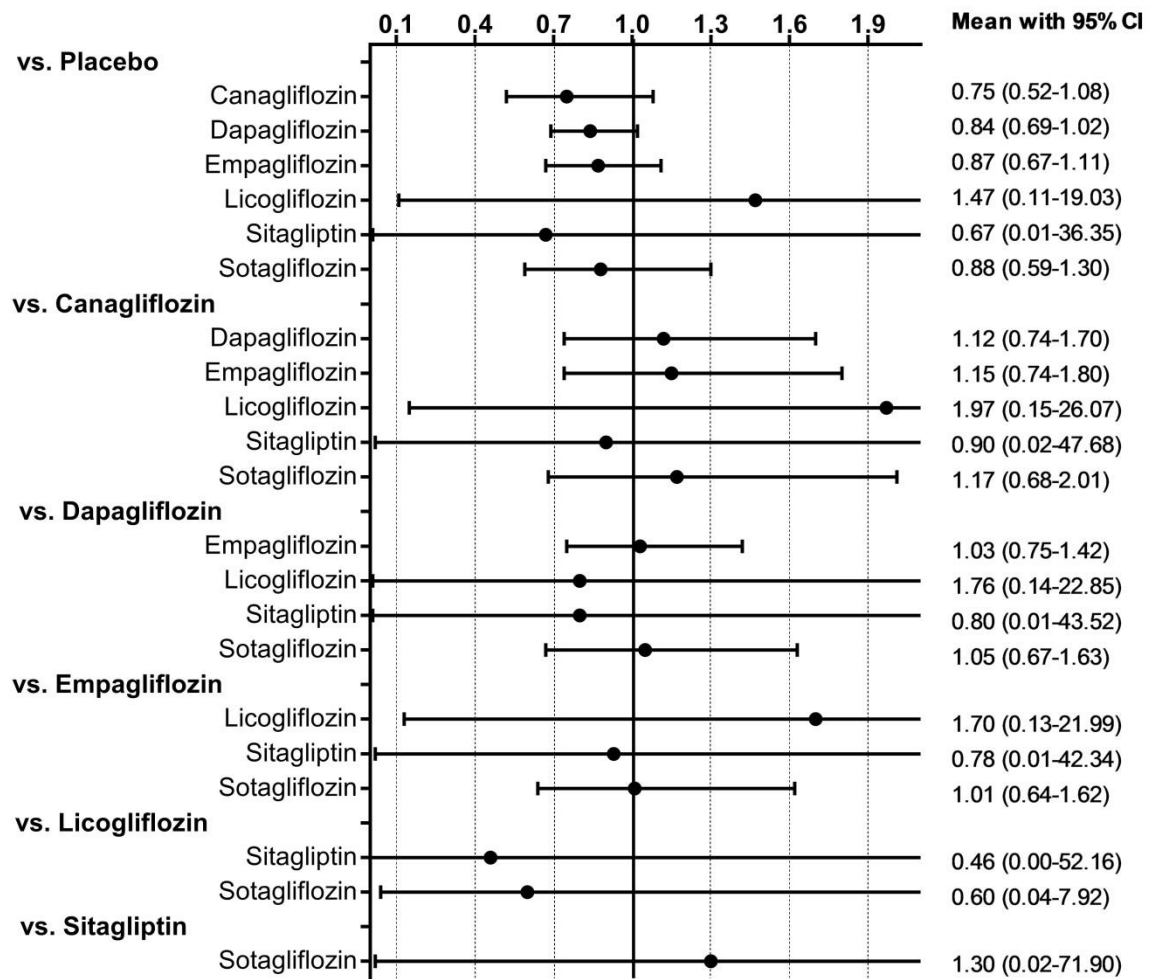

**Legend:** CI, confidence interval; HF, heart failure; T2D, type 2 diabetes mellitus

**Online Figure 26:** Predictive interval plot for SGLT2i classes with respect to CV mortality in subgroups of patients with both HF and T2D (sensitivity analysis)

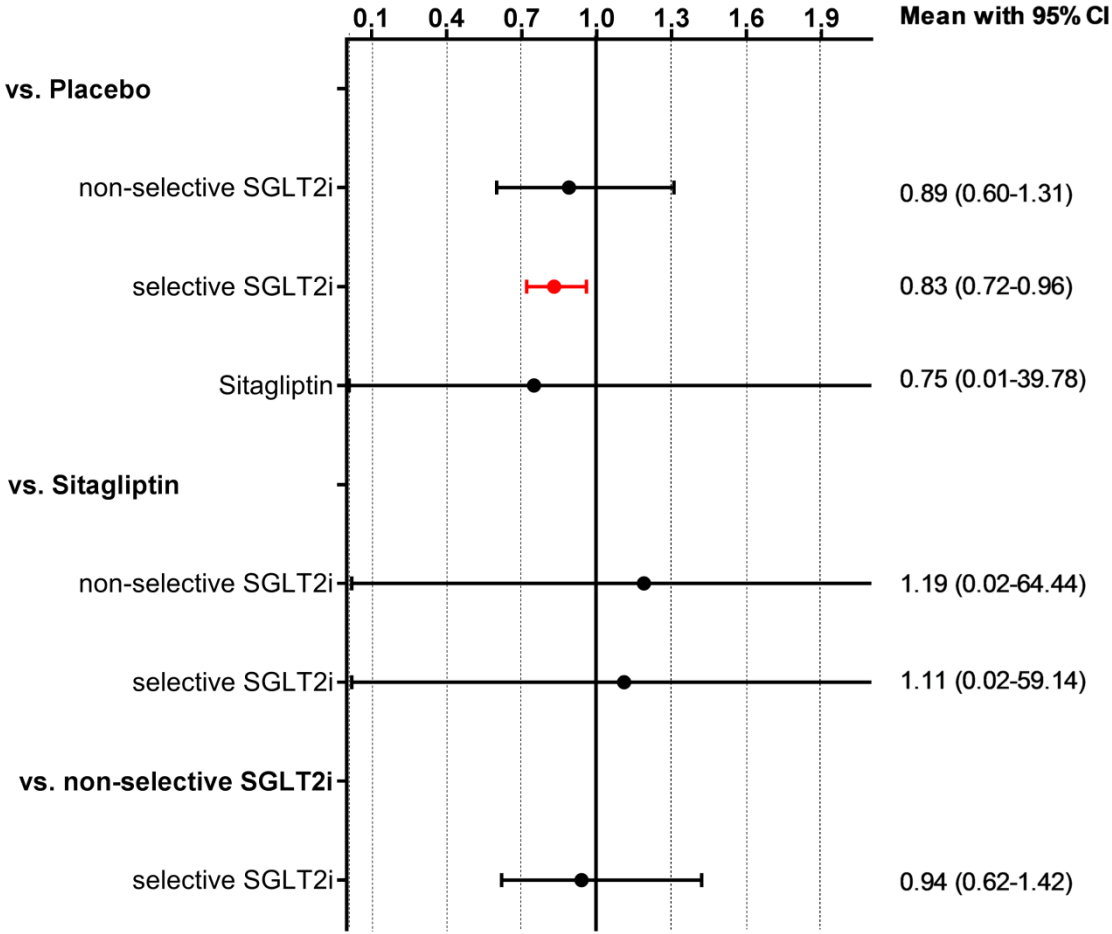

**Legend:** CI, confidence interval; CV, cardiovascular; HF, heart failure, SGLT2i, sodium-glucose cotransporter 2 inhibitor; T2D, type 2 diabetes mellitus. Significant results are shown in red color.

**Online Figure 27:** Predictive interval plot for hospitalization for HF in subgroups of patients with both HF and T2D (sensitivity analysis)

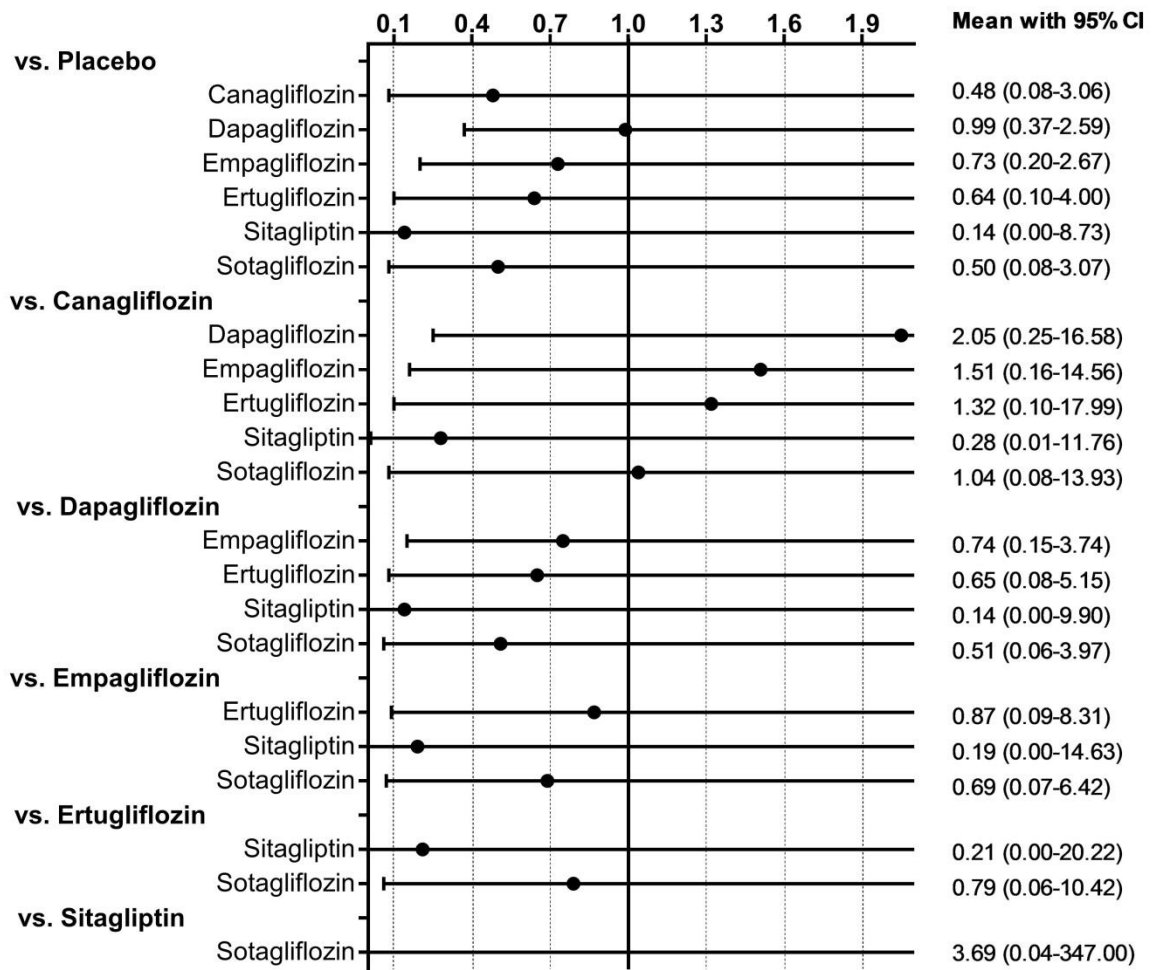

**Legend:** CI, confidence interval; HF, heart failure; T2D, type 2 diabetes mellitus

**Online Figure 28:** Predictive interval plot for SGLT2i classes with respect to hospitalizations for HF in subgroups of patients with both HF and T2D (sensitivity analysis)

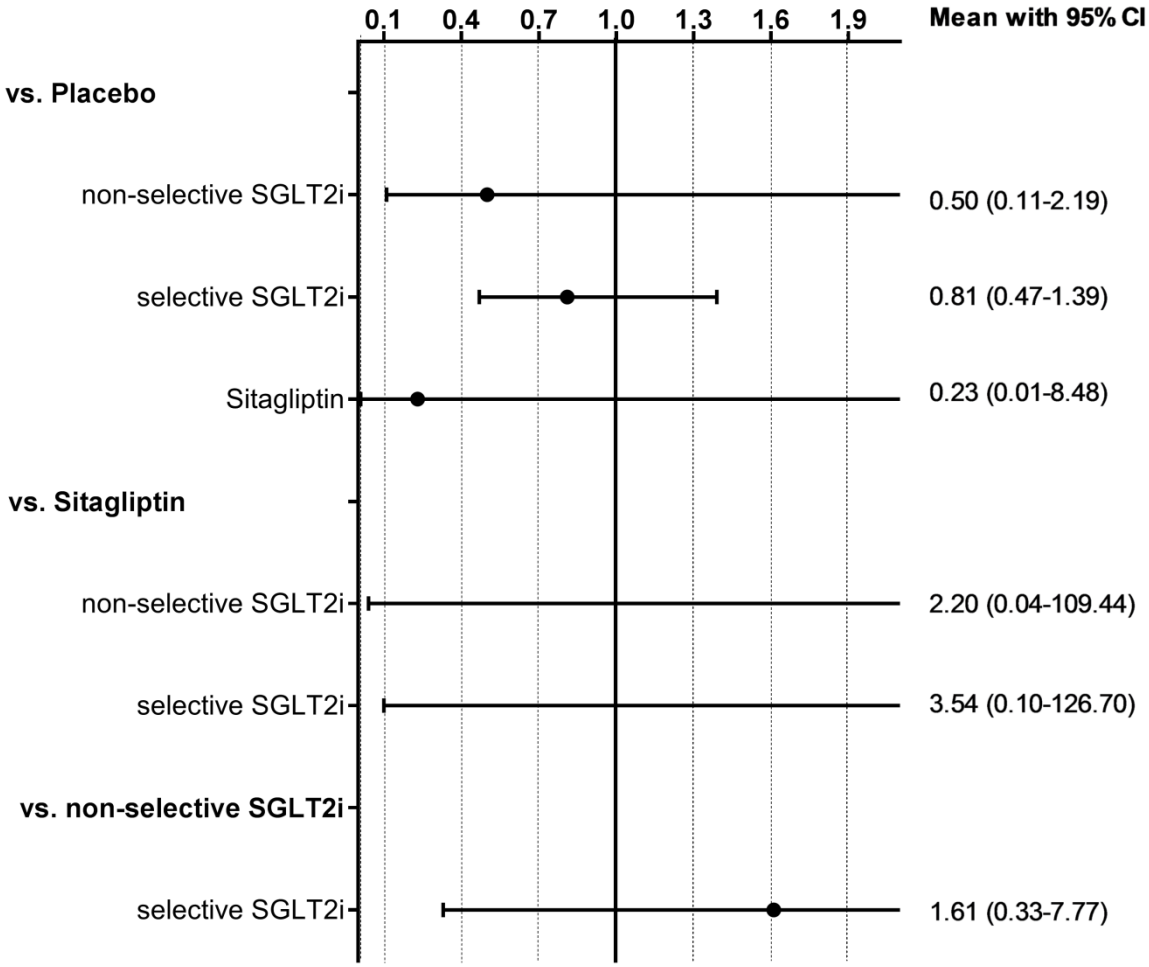

**Legend:** CI, confidence interval; HF, heart failure; SGLT2i, sodium-glucose cotransporter 2 inhibitor; T2D, type 2 diabetes mellitus.

**Online Figure 29:** Predictive interval plot for worsening RF in subgroups of patients with both HF and T2D (sensitivity analysis)

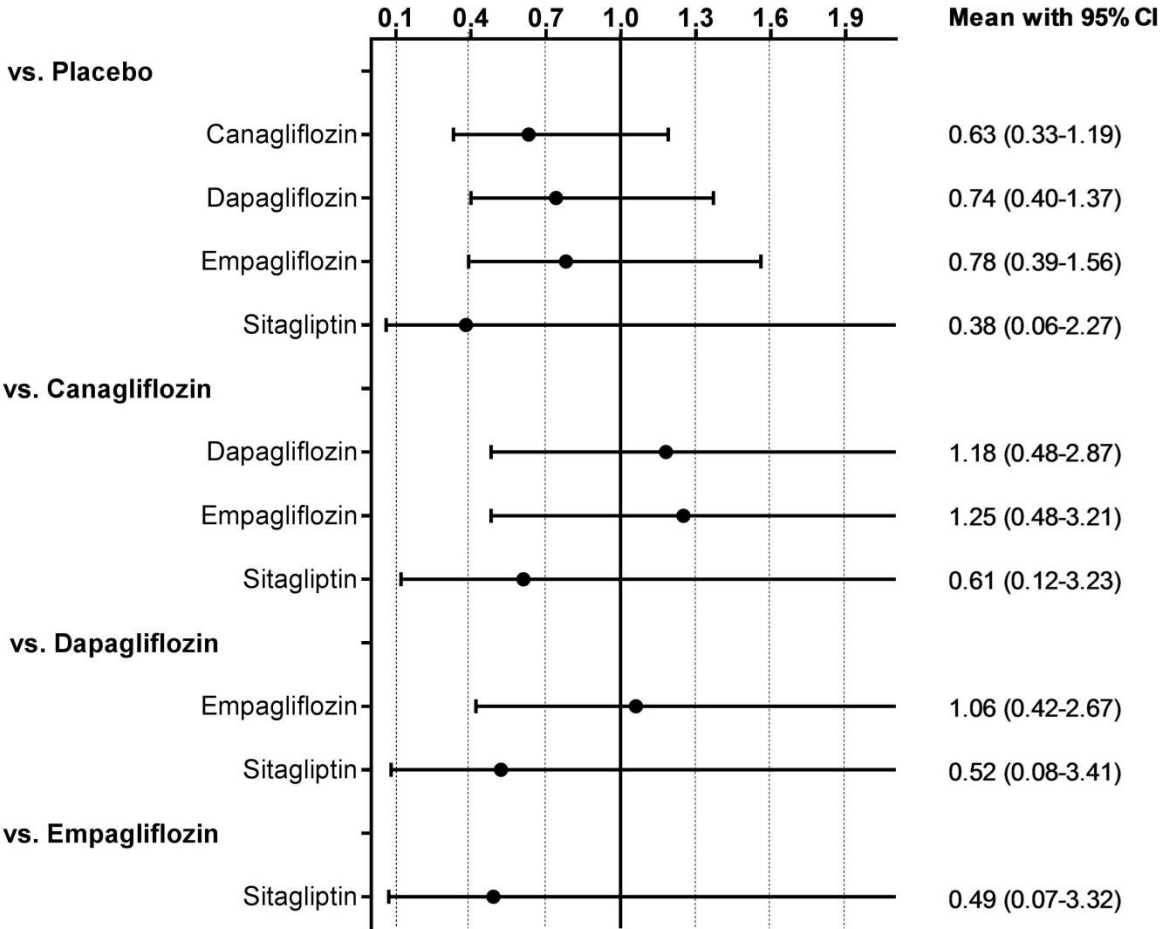

**Legend:** CI, confidence interval; HF, heart failure; RF, renal function; T2D, type 2 diabetes mellitus

**Online Figure 30:** Predictive interval plot for worsening RF or CV death in subgroups of patients with both HF and T2D (sensitivity analysis)

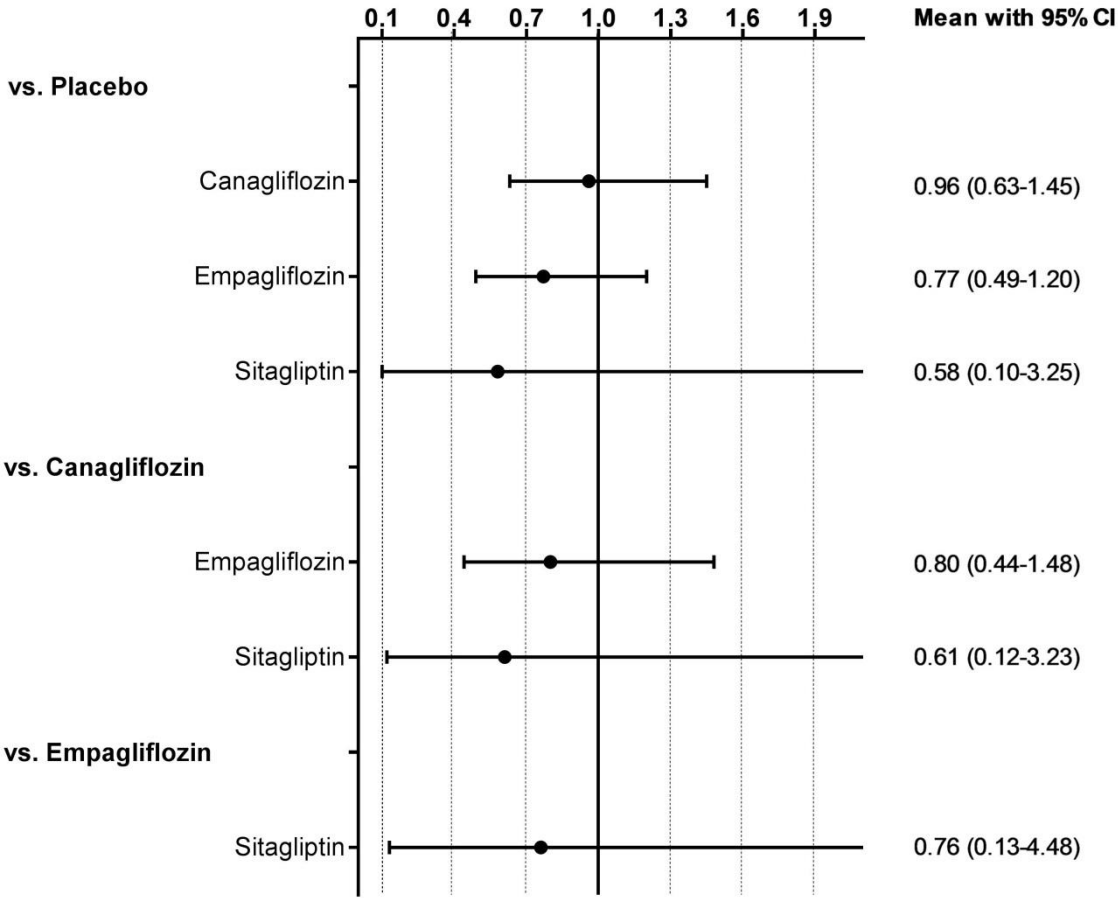

**Legend:** CV, cardiovascular; HF, heart failure; RF, renal function; T2D, type 2 diabetes mellitus

**SUPPLEMENTARY TABLES**

**Online Table 1:** Characteristics of SGLT2i included in analyses

| <b>Name of drug</b> | <b>Bioavailability</b> | <b>Protein binding</b> | <b>t<sub>max</sub></b> | <b>t<sub>1/2</sub></b>                       | <b>C<sub>max</sub></b>                                 | <b>SGLT2 selectivity over SGLT1</b> |
|---------------------|------------------------|------------------------|------------------------|----------------------------------------------|--------------------------------------------------------|-------------------------------------|
| Canagliflozin       | 65% (300 mg dose)      | 99%                    | 1-2 h                  | 10.6 h (100 mg dose)<br>13.1 h (300 mg dose) | 1,096 ng/ml (100 mg dose)<br>3,480 ng/ml (300 mg dose) | 250 fold                            |
| Dapagliflozin       | 78%                    | 91%                    | 1-1.5 h                | 12.9 h                                       | 79.6 ng/ml (5 mg dose)<br>165.0 ng/ml (10 mg dose)     | 1,200 fold                          |
| Empagliflozin       | 78%                    | 86.2%                  | 1.5 h                  | 13.2 h (10 mg dose)<br>13.3 h (20 mg)        | 259 ng/ml (10 mg dose)<br>687 ng/ml (20 mg dose)       | 2,500 fold                          |

|               |        |      |           |         |                        |            |
|---------------|--------|------|-----------|---------|------------------------|------------|
| Ertugliflozin | 70-90% | 95%  | 0.5-1.5 h | 11-17 h | 268 ng/ml (15 mg dose) | 2,000 fold |
| Licogliflozin | 77%    | n/a  | 0.75 h    | 17.2 h  | 1,480 ng/ml            | 35 fold    |
| Sotagliflozin | >50%   | >90% | 3.0 h     | 13.2 h  | 64 ng/ml               | 20 fold    |

(52, 62-64)

$C_{max}$ , maximum serum concentration that drug achieves in body after the drug has been administered; n/a, not available; SGLT, sodium-glucose cotransporter;  $t_{max}$ , time to achieve maximum plasma concentration;  $t_{1/2}$ , biological half-life.



**Online Table 2:** Characteristics of HF patients included in SGLT2i trials

| Record                            | Trial *          | Patients<br>(n) | Age<br>(years) | Female<br>(n, %) | LVEF<br>(%) | HbA1c<br>(%) | T2D<br>(n, %)  | eGFR<br>(ml/min<br>/1.73m <sup>2</sup> ) | Background<br>diabetes<br>treatment                                                          | Background<br>HF treatment                                                |
|-----------------------------------|------------------|-----------------|----------------|------------------|-------------|--------------|----------------|------------------------------------------|----------------------------------------------------------------------------------------------|---------------------------------------------------------------------------|
| Bhatt (8)                         | SOLOIST-WHF      | 1,222           | 70             | 412 (33.7)       | 35          | 7.1          | 1,222<br>(100) | 49.7                                     | any<br><br>(52% metformin,<br>16% DPP4i, 3%<br>GLP1-RA, 19%<br>sulfonylurea, 36%<br>insulin) | 83%<br><br>ACEI/ARB,<br>17% ARNI,<br>92% BB, 64%<br>MRA, 95%<br>diuretics |
| Butler (25), Fitchett<br>(26, 27) | EMPA-REG-OUTCOME | 706             | 63             | 211 (29.9)       | n/a         | 8.1          | 706<br>(100)   | 68.7                                     | any                                                                                          | 87%<br><br>ACEI/ARB,<br>79% BB, 24%<br>MRA, 72%<br>diuretics              |
| Cannon (28),<br>Cosentino (29)    | VETIS CV         | 1,958           | 64             | 624 (31.8)       | n/a         | 7.1          | 1,958<br>(100) | n/a                                      | any                                                                                          | 84%<br><br>ACEI/ARB,                                                      |

|              |                                                |       |             |           |     |     |              |      |                                                                                                                                |                                                                       |
|--------------|------------------------------------------------|-------|-------------|-----------|-----|-----|--------------|------|--------------------------------------------------------------------------------------------------------------------------------|-----------------------------------------------------------------------|
|              |                                                |       |             |           |     |     |              |      |                                                                                                                                | 79% BB, 19%<br>MRA, 57%<br>diuretics                                  |
| Carbone (30) | CANA-HF                                        | 36    | 56 ±<br>7.8 | 8 (22.2)  | 29  | 8.3 | 36 (100)     | 79.2 | any<br>(56% metformin,<br>3% DPP4i, 3%<br>GLP1-RA, 17%<br>sulfonylurea, 47%<br>insulin)                                        | 69%<br>ACEI/ARB,<br>17% ARNI,<br>94% BB, 61%<br>MRA, 86%<br>diuretics |
| de Boer (31) | licogliflozin vs. empagliflozin<br>vs. placebo | 124 † | 69          | 35 (28.2) | n/a | n/a | 124<br>(100) | 67   | any<br>(70% metformin,<br>18% DPP4i, 2%<br>GLP1-RA, 2%<br>alpha glucosidase<br>inhibitor, 21%<br>sulfonylurea, 49%<br>insulin) | 3% ACEI/ARB,<br>1% ARNI, 2%<br>diuretics                              |

|                  |                                                                                                                                    |                                             |    |            |               |             |                |      |                                                                                      |                                                                       |
|------------------|------------------------------------------------------------------------------------------------------------------------------------|---------------------------------------------|----|------------|---------------|-------------|----------------|------|--------------------------------------------------------------------------------------|-----------------------------------------------------------------------|
| Jensen (32)      | EMPIRE-HF                                                                                                                          | 190                                         | 64 | 28 (14.7)  | 29<br>(25-35) | 5.8         | 33 (17.4)      | 74   | any<br>(9% metformin,<br>3% DPP4i, 3%<br>GLP1-RA, 2%<br>sulfonylurea, 4%<br>insulin) | 65%<br>ACEI/ARB,<br>31% ARNI,<br>95% BB, 66%<br>MRA, 64%<br>diuretics |
| Kato (33)        | DECLARE                                                                                                                            | 1,987                                       | 64 | 669 (33.7) | n/a           | 8.2         | 1,987<br>(100) | 84   | any                                                                                  | 86%<br>ACEI/ARB,<br>81% BB, 19%<br>MRA, 64%<br>diuretics              |
| Kosiborod (34) ‡ | 1. Moderate KD (56)<br>2. Add-on to sulfonylurea (57)<br>3. Add-on to insulin (58)<br>4. High CV risk (59)<br>5. High CV risk (60) | 1. 19<br>2. 13<br>3. 18<br>4. 118<br>5. 152 | 64 | 119 (37.2) | n/a           | 8.2<br>±0.9 | 320<br>(100)   | 70.3 | 1. any<br>2. glimepiride<br>3. insulin ± OAD<br>4. OAD ± insulin<br>5. OAD ± insulin | 88%<br>ACEI/ARB,<br>82% BB, 16%<br>MRA, 63%<br>diuretics              |

|                                  |             | $\Sigma = 320$ |                |            |               |              |                |                |                                                                                              |                                                                           |
|----------------------------------|-------------|----------------|----------------|------------|---------------|--------------|----------------|----------------|----------------------------------------------------------------------------------------------|---------------------------------------------------------------------------|
| Lee (35)                         | SUGAR-DM-HF | 105            | 68.7 ±<br>11.1 | 28 (26.7)  | 32.5 ±<br>9.8 | 7.2 ±<br>1.5 | 82 (78.1)      | 67.3 ±<br>22.0 | any<br><br>(75% metformin,<br>36% DPP4i, 8%<br>GLP1-RA, 41%<br>sulfonylurea, 15%<br>insulin) | 61%<br><br>ACEI/ARB,<br>34% ARNI,<br>91% BB, 60%<br>MRA, 57%<br>diuretics |
| McMurray (6, 36),<br>Petrie (37) | DAPA-HF     | 4,744          | 66             | 1,091 (23) | 31            | 6.5          | 2139<br>(45.1) | 66             | any<br><br>(21% metformin,<br>7% DPP4i, 0.4%<br>GLP1-RA, 9%<br>sulfonylurea, 11%<br>insulin) | 84%<br><br>ACEI/ARB,<br>11% ARNI,<br>96% BB, 71%<br>MRA, 93%<br>diuretics |
| Nassif (38)                      | DEFINE-HF   | 263            | 61             | 70 (26.6)  | 26            | 7.2          | 166<br>(63.1)  | 69.1           | any<br><br>(24% metformin,<br>8% DPP4i, 2%<br>GLP1-RA, 13%                                   | 59%<br><br>ACEI/ARB,<br>32% ARNI,<br>97% BB, 61%                          |

|                           |                 |       |               |            |     |              |                 |                |                                                                                                                      |                                                     |
|---------------------------|-----------------|-------|---------------|------------|-----|--------------|-----------------|----------------|----------------------------------------------------------------------------------------------------------------------|-----------------------------------------------------|
|                           |                 |       |               |            |     |              |                 |                | sulfonylurea, 33%<br>insulin)                                                                                        | MRA, 86%<br>diuretics                               |
| Packer (7), Anker<br>(39) | EMPEROR-Reduced | 3,730 | 67            | 893 (26.5) | 27  | n/a          | 1,856<br>(49.8) | 62             | any                                                                                                                  | 70%<br>ACEI/ARB,<br>19% ARNI,<br>95% BB, 71%<br>MRA |
| Perkovic (40)             | CREDESCENCE     | 652   | n/a           | n/a        | n/a | n/a          | 652<br>(100)    | n/a            | any                                                                                                                  | n/a                                                 |
| Radholm (41)              | CANVAS Program  | 1,461 | 63.8 ±<br>8.3 | 648 (44.4) | n/a | 8.4 ±<br>1.0 | 1,461<br>(100)  | 73.0 ±<br>19.6 | any<br><br>(68% metformin,<br>8% DPP4i, 2%<br>GLP1-RA, 45%<br>sulfonylurea, 1%<br>thiazolidinedione,<br>48% insulin) | 86%<br>ACEI/ARB,<br>70% BB, 60%<br>diuretics        |

|                                |                    |     |                |            |        |     |          |     |                                                          |                                                                       |
|--------------------------------|--------------------|-----|----------------|------------|--------|-----|----------|-----|----------------------------------------------------------|-----------------------------------------------------------------------|
| Santos-Gallego<br>(42)         | EMPA-TROPISM       | 84  | 62 ±<br>12.1   | 30 (36)    | 36 ± 8 | 5.8 | 0 (0)    | 82  | none                                                     | 42%<br>ACEI/ARB,<br>43% ARNI,<br>88% BB, 33%<br>MRA, 61%<br>diuretics |
| Singh (43)                     | REFORM             | 56  | 67.1           | 19 (33.9)  | 45     | 7.7 | 56 (100) | 72  | any<br>(55% metformin,<br>39% other OAD,<br>29% insulin) | 89%<br>ACEI/ARB,<br>82% BB, 41%<br>MRA                                |
| Boehringer<br>Ingelheim (44) § | EMPERIAL-Reduced   | 312 | 69.0 ±<br>10.2 | 80 (25.6)  | n/a    | n/a | n/a      | n/a | any                                                      | any                                                                   |
| Boehringer<br>Ingelheim (45) § | EMPERIAL-Preserved | 315 | 73.5 ±<br>8.8  | 136 (43.2) | n/a    | n/a | n/a      | n/a | any                                                      | any                                                                   |

ACEI, angiotensin converting enzyme inhibitor; ARB, angiotensin receptor blocker; ARNI, angiotensin receptor neprilysin inhibitor; BB, beta-blocker; CV, cardiovascular; DPP4i, dipeptidyl peptidase-4 inhibitor; eGFR, estimated glomerular filtration rate; GLP1-RA, glucagon-like peptide-1 receptor agonist; HF, heart failure; LVEF, left ventricular ejection fraction; MRA, mineralocorticoid receptor antagonist; n/a, not available; OAD, oral antidiabetic drug; SGLT2i, sodium-glucose cotransporter 2 inhibitor; T2D, type 2

diabetes mellitus.

\* Acronym/ short title.

† Of the 124 patients randomized in the study, 80 were discontinued due to early study termination, with 44 patients completing the 12-weeks study.

‡ This record presents a HF subgroup meta-analysis from five randomized controlled trials. Patients with HF included in any of the five trials have been identified retrospectively and data have been pooled for joint analyses.

§ At the time of the literature search, results have not been published in a journal but were extracted from [www.clinicaltrials.gov](http://www.clinicaltrials.gov).

**Online Table 3:** Endpoint characteristics of trials analyzing the effects of SGLT2i in patients with HF

| Record                              | Trial *                                | Hospitalization for HF |              | All-cause mortality |           | CV mortality |              | Worsening RF |        | Worsening HF or CV death |              | Worsening RF or CV death |        |
|-------------------------------------|----------------------------------------|------------------------|--------------|---------------------|-----------|--------------|--------------|--------------|--------|--------------------------|--------------|--------------------------|--------|
|                                     |                                        | Tx                     | Ctrl         | Tx                  | Ctrl      | Tx           | Ctrl         | Tx           | Ctrl   | Tx                       | Ctrl         | Tx                       | Ctrl   |
| Bhatt (8)                           | SOLOIST-WHF                            | 194/608<br>†           | 297/614<br>† | 65/608              | 76/614    | 51/608       | 58/614       | n/a          | n/a    | 245/608<br>†             | 355/614<br>† | n/a                      | n/a    |
| Butler (25)<br>Fitchett<br>(26, 27) | EMPA-REG<br>OUTCOME                    | 48/462                 | 30/244       | 56/462              | 35/244    | 38/462       | 27/244       | 21/458       | 14/241 | 75/462                   | 49/244       | 56/462                   | 37/241 |
| Cannon (28),<br>Cosentino<br>(29)   | VERTIS CV                              | 69/<br>1,286           | 55/672       | n/a                 | n/a       | n/a          | n/a          | n/a          | n/a    | 164/<br>1,286            | 99/672       | n/a                      | n/a    |
| Carbone (30)                        | CANA-HF                                | 1/17                   | 0/19         | 0/17                | 0/19      | 0/17         | 0/19         | 4/17         | 3/19   | 1/17                     | 0/19         | 4/17                     | 3/19   |
| de Boer (31)                        | licogliflozin vs.<br>empagliflozin vs. | n/a                    | n/a          | 1/61                | 0/30 1/33 | 1/61         | 0/30<br>0/33 | n/a          | n/a    | n/a                      | n/a          | n/a                      | n/a    |



|                                     |                                                                                                                                          |               |               |               |               |               |               |              |              |               |               |     |     |
|-------------------------------------|------------------------------------------------------------------------------------------------------------------------------------------|---------------|---------------|---------------|---------------|---------------|---------------|--------------|--------------|---------------|---------------|-----|-----|
|                                     | placebo                                                                                                                                  |               |               |               |               |               |               |              |              |               |               |     |     |
| Jensen (32)                         | EMPIRE-HF                                                                                                                                | 1/95          | 0/95          | 0/95          | 0/95          | 0/95          | 0/95          | n/a          | n/a          | 1/95          | 0/95          | n/a | n/a |
| Kato (33)                           | DECLARE                                                                                                                                  | 92/980        | 130/<br>1,007 | 122/980       | 149/<br>1,007 | 79/980        | 85/<br>1,007  | n/a          | n/a          | 151/980       | 194/<br>1,007 | n/a | n/a |
| Kosiborod<br>(34) †                 | 1. Moderate KD (56)<br>2. Add-on to<br>sulfonylurea (57)<br>3. Add-on to insulin<br>(58)<br>4. High CV risk (59)<br>5. High CV risk (60) | 1/171         | 7/149         | 0/171         | 1/149         | n/a           | n/a           | n/a          | n/a          | n/a           | n/a           | n/a | n/a |
| Lee (35)                            | SUGAR-DM-HF                                                                                                                              | n/a           | n/a           | 2/52          | 0/53          | 1/52          | 0/53          | n/a          | n/a          | n/a           | n/a           | n/a | n/a |
| McMurray (6,<br>36), Petrie<br>(37) | DAPA-HF                                                                                                                                  | 231/<br>2,373 | 318/<br>2,371 | 276/<br>2,373 | 329/<br>2,371 | 227/<br>2,373 | 273/<br>2,371 | 28/<br>2,373 | 39/<br>2,371 | 382/<br>2,373 | 495/<br>2,371 | n/a | n/a |
| Nassif (38)                         | DEFINE-HF                                                                                                                                | 10/131        | 8/132         | 1/131         | 1/132         | 1/131         | 1/132         | 1/131        | 1/132        | n/a           | n/a           | n/a | n/a |

|                                   |                        |               |               |               |               |               |               |              |              |               |               |        |        |
|-----------------------------------|------------------------|---------------|---------------|---------------|---------------|---------------|---------------|--------------|--------------|---------------|---------------|--------|--------|
| Packer (7),<br>Anker (98)         | EMPEROR-<br>Reduced    | 246/<br>1,863 | 342/<br>1,867 | 249/<br>1,863 | 266/<br>1,867 | 187/<br>1,863 | 202/<br>1,867 | 30/<br>1,863 | 58/<br>1,867 | 361/<br>1,863 | 462/<br>1,867 | n/a    | n/a    |
| Perkovic (40)                     | CREDENCE               | n/a           | n/a           | n/a           | n/a           | n/a           | n/a           | n/a          | n/a          | n/a           | n/a           | 52/329 | 53/323 |
| Radholm (41)                      | CANVAS                 | 35/803        | 57/658        | 74/803        | 79/658        | 60/803        | 64/658        | 17/803       | 22/658       | 88/803        | 115/658       | n/a    | n/a    |
| Santos-<br>Gallego (42)           | EMPA-TROPISM           | 0/42          | 2/42          | 0/42          | 1/42          | 0/42          | 1/42          | n/a          | n/a          | n/a           | n/a           | n/a    | n/a    |
| Singh (43)                        | REFORM                 | 1/28          | 1/28          | 1/28          | 4/28          | 0/28          | 3/28          | n/a          | n/a          | n/a           | n/a           | n/a    | n/a    |
| Boehringer<br>Ingelheim<br>(44) § | EMPERIAL-<br>Reduced   | n/a           | n/a           | 3/155         | 3/156         | n/a           | n/a           | n/a          | n/a          | n/a           | n/a           | n/a    | n/a    |
| Boehringer<br>Ingelheim<br>(45) § | EMPERIAL-<br>Preserved | n/a           | n/a           | 1/157         | 0/158         | n/a           | n/a           | n/a          | n/a          | n/a           | n/a           | n/a    | n/a    |

Numbers indicate number of events/ number of patients.

CV, cardiovascular; Ctrl, control; HF, heart failure; n/a, not available; RF, renal function; SGLT2i, sodium-glucose cotransporter-2 inhibitor; T2D, type 2 diabetes mellitus; Tx, treatment.

\* Acronym/ short title.

† Numbers include urgent HF visits.

‡ This record presents a HF subgroup meta-analysis from five randomized controlled trials. Patients with HF included in any of the five trials have been identified retrospectively and data have been pooled for joint analyses.

§ At the time of the literature search, results have not been published in a journal but were extracted from [www.clinicaltrials.gov](http://www.clinicaltrials.gov).
